# Supplementary material for: Evaluation of CMIP6 model simulations of PM 2.5 and its components over China
Source: Copernicus journal article supplement (doi:10.5194/gmd-17-4821-2024), 2024-06-20
Supplement: Supplementary file 1 [file gmd-17-4821-2024-supplement.zip]

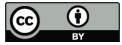

*Supplement of*

## **Evaluation of CMIP6 model simulations of PM<sub>2.5</sub> and its components over China**

**Fangxuan Ren et al.**

*Correspondence to:* Jintai Lin ([linjt@pku.edu.cn](mailto:linjt@pku.edu.cn))

- [gmd-17-4821-2024-supplement-title-page.pdf](#)
- [SI\\_Figures and tables\\_Fangxuan Ren\\_20240504.pdf](#)
- [Table S4.xlsx](#)

The copyright of individual parts of the supplement might differ from the article licence.
