# Supplementary material for: Evaluation of CMIP6 model simulations of PM 2.5 and its components over China
Source: Copernicus journal article supplement (doi:10.5194/gmd-17-4821-2024), 2024-06-20
Supplement: Supplementary file 1 [file Table S4.xlsx]

## Sheet: Sheet1
Table S4. Observations of PM2.5 component concentrations during 2000-2014 from the literature. PM2.5 component concentrations are averaged if the data are sampled at the same site. Concentrations are all in the unit of µg m-3. NaN indicates a lack of record from the literature.
Province or municipality	Latitude (°)	Longitude (°)	Including record numbers	Sulfate	Nitrate	Ammonium	Organic carbon	Black carbon	References
Anhui	33.92	116.76	5	18.7	11.8	5.2	36.4	7.3	Li (2014)
Beijing	39.9	116.4	113	20.74	18.55	10.29	20.59	5.79	Kim Oanh (2006); Wang (2005); Cao (2012); Pathak (2011); Zheng (2016); Zhao (2013a); Wang (2011); Shen (2017); Li (2019); Gao (2018)
Beijing	39.48	116.28	15	13.44	9.28	6.46	27.47	9.29	He (2001); Duan (2006); He (2012)
Beijing	39.93	116.36	35	12.08	8.35	5.85	23.21	9.75	He (2001); Duan (2006)
Beijing	39.967	116.373	15	19.43	12.83	9.53	18.88	6.77	Sun (2004); Liu (2018b)
Beijing	39.907	116.19	10	21.15	13.4	12.15	22.8	8.2	Sun (2004)
Beijing	39.85	116.31	10	24.8	16.25	15.03	24.35	13.9	Sun (2004)
Beijing	40.13	117.12	15	18.74	10.19	8.04	16.63	4.14	Yan (2012); Zhao (2013a)
Beijing	40.37	116.83	3	13	6.4	6.1	NaN	NaN	He (2012)
Beijing	39.98	116.34	5	15.85	8.25	9.44	28.85	8.55	Song (2012)
Beijing	39.95	116.3	5	14.6	9.7	8.3	18.8	5.9	Liu (2014)
Beijing	39.99	116.3	25	13.64	11.32	6.92	16.88	4.96	Zhang (2013a)
Beijing	39.59	116.21	33	27.83	22.57	16.17	22.03	5.67	Wang (2015a); Ho (2016); Zhou (2018b)
Beijing	39.97	116.37	5	11.9	9.3	5.3	11.94	4.1	Liu (2018b)
Beijing	40.32	116.63	3	25	13	8	NaN	NaN	Zhou (2018b)
Beijing	40.02	116.28	5	11.3	28.56	10.76	13.92	1.91	Xu (2019)
Chongqing	29.59	106.54	15	33.67	9.6	13.97	36.55	9.8	Cao (2012); Liu (2018b)
Chongqing	29.42	106.53	5	25.5	5.3	7.9	30.13	6.39	He (2012)
Chongqing	29.48	106.48	3	23.4	5	7.7	NaN	NaN	He (2012)
Chongqing	29.76	106.38	3	23.9	4.8	7.3	NaN	NaN	He (2012)
Chongqing	29.37	106.3	20	12.07	6.03	5.83	11.42	4.1	Chen (2019); Wang (2018)
Chongqing	30.39	108.37	36	NaN	NaN	NaN	16.37	4.69	Zhang (2015b); Huang (2018)
Fujian	24.46	118.1	80	11.26	6.32	4.58	14.09	3.03	Cao (2012); Zhang (2012); Ho (2016); Zhang (2016)
Fujian	26.08	119.3	20	10.78	4.4	3.9	8.5	2.17	Xu (2012)
Fujian	25.97	117.36	2	NaN	NaN	NaN	14.3	4.8	Yin (2012)
Fujian	24.58	118.09	8	NaN	NaN	NaN	15.36	2.86	Zhang (2011a); Chen (2012)
Fujian	24.28	118.09	5	11.29	5.5	6.26	8.65	1.32	Wu (2015)
Fujian	24.53	118.35	5	10.91	5.67	6.14	10.05	1.47	Wu (2015)
Fujian	25.19	119.06	5	10.72	6.21	6.24	8.06	1.15	Wu (2015)
Fujian	26.04	119.18	5	11.02	6.11	6.23	11.95	1.83	Wu (2015)
Fujian	30.3	119.73	5	11.2	8.7	7.3	13.56	2.9	Liu (2018b)
Fujian	24.52	118.1	5	11.7	8.36	4.46	15.59	3.34	Zhang (2016)
Fujian	24.57	118.1	5	11.89	6.72	5.17	11.89	2.59	Zhang (2016)
Gansu	38.5	102.18	10	9.7	1.5	3.5	12.35	3.1	Cao (2012)
Gansu	36.0598	104.411	5	11	2.7	3.8	6.6	2.9	Pathak (2011)
Gansu	36.046	103.833	25	6.05	5.09	3.2	18.65	9.02	Tan (2016b); Wang (2016c)
Gansu	36.1	103.62	20	8.2	7.93	5.33	15.33	6.68	Wang (2016c)
Guangdong	22.27	113.57	3	17.1	8.6	4.5	NaN	NaN	Lai (2007)
Guangdong	22.55	114.05	3	8.7	2.5	0.4	NaN	NaN	Lai (2007)
Guangdong	22.22	113.32	23	8.7	2.46	3.12	9.38	2.65	Lai (2007); Tao (2017)
Guangdong	22.32	113.56	8	11.5	3.35	2.6	11.14	3.9	Hagler (2006); Lai (2007)
Guangdong	22.3	113.34	5	11.9	1.8	3.3	10.5	2.5	Hagler (2006)
Guangdong	23.07	113.15	20	10.88	2.7	4.08	10.79	4.13	Hagler (2006); Tao (2017)
Guangdong	23.38	113.38	5	10.4	0.3	2.4	9.07	1.4	Hagler (2006)
Guangdong	23.13	113.27	16	14.43	6.45	3.55	17.05	5.85	Lai (2007); Cao (2012)
Guangdong	23.1	113.45	6	17.65	4.7	2.3	NaN	NaN	Lai (2007)
Guangdong	23.17	113.27	6	15.45	7.9	4.7	NaN	NaN	Lai (2007)
Guangdong	23.1604	113.281	5	31.22	2.83	6.07	30.61	9.47	Wang (2006a)
Guangdong	23.1233	113.244	5	42.69	2.22	7.41	29.5	9.45	Wang (2006a)
Guangdong	23.1237	113.364	5	27	1.5	5.08	31.53	11.87	Wang (2006a)
Guangdong	23.0836	113.33	5	26.52	3.35	5.9	36.95	16.85	Wang (2006a)
Guangdong	22.64	113.61	5	12.7	5.8	5	14.9	10.5	Pathak (2011)
Guangdong	23.17	112.57	5	10.24	0.47	3.04	5.3	0.7	Li (2010)
Guangdong	23.25	113.6	5	5.6	12	4.7	17.5	4.1	Yang (2011)
Guangdong	23.14	113.36	5	8.3	4.7	3.4	21.5	4.7	Tan (2009)
Guangdong	22.42	113.32	15	17.97	9.27	6.73	17.23	4.07	Fu (2014)
Guangdong	23.02	113.12	15	18.7	12.87	10.2	17.97	4.2	Tan (2016a); Fu (2014)
Guangdong	23.1	113.3	10	15.2	4.2	5.9	13.05	3.25	Zheng (2016)
Guangdong	22.5	113.9	25	13.28	2.7	3.46	8.58	4.68	Zheng (2016); Zhou (2016b)
Guangdong	22.6	113.1	5	15.7	3.8	6.6	8.8	1.7	Zheng (2016)
Guangdong	23.3	113.1	5	10.8	0.7	4	5.6	0.9	Zheng (2016)
Guangdong	23.12	113.35	5	18.1	7.8	5.1	9	6	Tao (2014b)
Guangdong	22.71	113.55	5	24.2	9.5	5.9	19.3	3.6	Ding (2011)
Guangdong	22.7	112.9	5	20.6	9.7	10.5	15.7	5.8	Zheng (2016)
Guangdong	23.05	113.75	10	11.36	4.44	5.48	10.75	3.39	Wang (2015c); Zou (2017)
Guangdong	22.35	113.58	6	12	5.12	NaN	NaN	NaN	Dai (2013)
Guangdong	22.52	113.38	5	9.8	6.4	2.8	7	1.2	Zhou (2016b)
Guangdong	23.65	113.63	20	12.25	1.93	5.13	6.13	0.8	Lai (2016)
Guangdong	23	113.35	5	8.25	4.56	4.19	NaN	NaN	Liu (2017)
Guangdong	22.53	114.05	5	7.71	3.3	3.4	NaN	NaN	Liu (2017)
Guangdong	22.48	114.55	5	8.42	1.56	2.8	NaN	NaN	Liu (2017)
Guangdong	23.17	112.5	5	10.1	4.5	4	7.25	2	Liu (2018b)
Guangdong	22.95	113.35	10	9.35	6.1	4.25	13.35	2.7	Cui (2015)
Guangdong	21.16	113.23	5	13.1	7.2	4.8	10.44	7.1	Liu (2018b)
Guangdong	23.07	113.21	5	8.2	2.4	3.6	7.5	4.2	Tao (2017)
Guangxi	22.63	110.17	5	14.6	6.2	5.65	20.95	5.85	Cao (2012)
Guangxi	22.87	110.53	12	5.73	1.35	2.75	NaN	NaN	Wang (2016b)
Hainan	20	110.35	5	2.17	0.13	0.56	2.4	0.2	Li (2010)
Hainan	19.32	110.1	4	4.97	1.73	NaN	NaN	NaN	Fang (2017)
Hainan	18.25	109.5	5	4.2	1.2	0.4	3.1	1.2	Zhou (2018a)
Hainan	20.03	110.35	5	NaN	NaN	NaN	5.6	2.5	Liu (2018a)
Hebei	38.05	114.52	5	35.63	30.38	9.33	26.52	9.77	Zhao (2013a)
Hebei	40.97	117.93	5	13	5.81	4.06	18.98	7.41	Zhao (2013a)
Hebei	39.63	118.2	12	10.2	9.37	6	NaN	4.7	Wen (2016)
Hebei	40.4	117.58	5	8.4	3.7	3.4	7.75	1.5	Liu (2018b)
Hebei	39.64	118.17	5	21.8	10	13.4	NaN	3.93	Wen (2016)
Hebei	36.57	114.51	25	22.38	16.56	11.38	19.28	7.5	Zhao (2019)
Hebei	38.87	115.47	20	20.35	24.15	12.8	51.18	7.53	Gao (2018)
Henan	34.48	113.31	7	20.5	16.8	11.6	20.2	4	Geng (2013); Wang (2017a)
Henan	34.8	113.517	25	29.83	17.23	16.17	26.26	6.76	Geng (2013); Jiang (2018)
Henan	35.19	113.54	5	39.78	32.25	13.17	23.65	7.34	Feng (2017)
Hong Kong	22.303	114.179	10	10.43	1.73	2.52	9.05	5.89	Ho (2003)
Hong Kong	22.3105	114.223	10	12.67	1.98	2.39	9.05	4.89	Ho (2003); Ho (2006)
Hong Kong	22.2163	114.267	5	13.07	1.32	1.66	5.52	1.36	Ho (2003)
Hong Kong	22.28	114.21	5	9.2	0.5	2.3	4.9	0.8	Hagler (2006)
Hong Kong	22.17	113.56	5	9	0.8	2.5	6.3	2	Hagler (2006)
Hong Kong	22.17	114.08	5	9.3	1	2.5	6.6	1.9	Hagler (2006)
Hong Kong	22.2	114.08	15	10.33	4.3	3.2	9.27	4.97	Cao (2012); Ho (2016)
Hong Kong	22.33	114.1	5	10.2	1.1	2.9	5.8	3.6	Yau (2013)
Hong Kong	22.7	114.21	5	16.69	2.42	6.69	13.1	3.6	Al-Naiema (2018)
Hong Kong	22.6	113.97	5	16.4	2.01	6.83	15.3	4.3	Al-Naiema (2018)
Hubei	30.5728	114.406	13	20.19	12.06	10.32	23.95	5.35	Cao (2012); Huang (2016)
Hubei	30.5	114.35	7	18	13.9	9.6	23.2	2.6	Cheng (2012); Zhang (2015a)
Hubei	30.68	113.34	2	NaN	NaN	NaN	26.53	8.6	Xiong (2017)
Hubei	30.62	114.3	2	NaN	NaN	NaN	19.44	5.21	Xiong (2017)
Hubei	30.63	114.4	2	NaN	NaN	NaN	16	3.82	Xiong (2017)
Jiangsu	32.0551	118.779	7	17.04	5.9	NaN	21.24	NaN	Wang (2002)
Jiangsu	32.0222	118.785	7	10.94	5.06	NaN	21.08	NaN	Wang (2002)
Jiangsu	32.0328	118.801	7	14.42	8.29	NaN	23.07	NaN	Wang (2002)
Jiangsu	32.0619	118.847	14	16.88	7.64	NaN	22.42	NaN	Wang (2002)
Jiangsu	32.0496	118.781	18	7.97	5.93	5.95	NaN	NaN	Wang (2003)
Jiangsu	32.05	118.76	2	NaN	NaN	NaN	15.7	10.4	Chen (2010)
Jiangsu	32.05	118.74	3	16.3	2.8	9.9	NaN	NaN	Zhang (2013b)
Jiangsu	31.6	120.3	10	12.85	6.05	6.2	9.75	2.8	Zheng (2016)
Jiangsu	33.2	118.2	5	13.4	13.7	8.2	6.3	1.5	Zheng (2016)
Jiangsu	32.3	118.45	10	16.7	16.8	9.85	18.69	4.75	Hua (2015)
Jiangsu	31.17	120.38	10	20.4	17	11.25	25.28	6.45	Hua (2015)
Jiangsu	32.03	118.46	55	20.36	11.68	5.61	22.7	7.81	Li (2016); Kong (2015)
Jiangxi	28.37	116.27	3	4.318	1.9565	2.7094	NaN	NaN	Zhao (2017)
Jiangxi	28.67	115.87	3	9.954	2.6902	2.369	NaN	NaN	Zhao (2017)
Jiangxi	28.67	115.85	3	4.757	4.8098	3.0346	NaN	NaN	Zhao (2017)
Jiangxi	28.68	115.9	3	8.893	5.788	4.2951	NaN	NaN	Zhao (2017)
Jiangxi	28.68	115.95	6	9.68	4.61	3.07	NaN	NaN	Zhao (2017)
Jilin	43.9	125.32	10	12.7	7.2	5.75	25.5	8	Cao (2012)
Jilin	43.12	128.9	5	12.97	0.33	3.94	4.9	0.5	Li (2010)
Jilin	44.2	125.57	5	8.274	3.19	4.908	24.44	6.67	Chen (2015)
Jilin	44.53	125.7	30	6.75	11.37	4.62	42.04	8.52	Chen (2015)
Jilin	42.4	128.01	5	3.3	1.1	1.8	5.5625	0.9	Liu (2018b)
Liaoning	38.43	120.58	6	8.71	3.89	3.09	NaN	NaN	Ma (2017)
Liaoning	41.5	123.4	5	13.2	4.6	4.5	14.5625	5.2	Liu (2018b)
Macao	22.1148	113.333	5	8.37	2.41	3.46	4.44	2.25	Wang (2019)
Macao	22.0936	113.335	5	8.24	2.7	3.65	5.94	4.46	Wang (2019)
Neimenggu	40.65	109.85	7	10.3	3.2	2.7	16.95	4.25	Zhang (2014); Zhou (2016a)
Qinghai	36.98	99.9	9	4.2	0.6	0.6	1.55	0.35	Li (2013); Zhang (2014b)
Shaanxi	34.23	108.88	53	30.83	13.96	10.13	54.08	12.9	Cao (2005); Cao (2012); Shen (2008); Zhang (2007); Zhang (2011b)
Shaanxi	34.31	108.95	5	38.1	16.2	11.2	28	8.8	Huang (2012)
Shaanxi	34.226	108.886	15	39.67	21.43	12.5	34.53	12	Xu (2016); Xu (2016a)
Shaanxi	34.16	108.56	5	23.1	17.8	8.3	18.6	6.7	Wang (2015b)
Shaanxi	34.22	108.95	25	22.6	17.5	9.86	26.36	6.48	Niu (2016)
Shaanxi	34.23	108.93	25	23.3	17.6	9.34	25.74	6.32	Niu (2016)
Shaanxi	34.28	108.93	25	23.96	17.96	9.22	29.26	7.72	Niu (2016)
Shaanxi	34.5	109.5	25	25.4	18.52	10.32	20.36	4.68	Niu (2016)
Shaanxi	34.37	107.13	25	20.44	15.34	7.76	23.46	4.48	Niu (2016)
Shaanxi	34.17	108.93	30	25.37	21.85	10.93	23.07	3.9	Niu (2016); Ho (2016)
Shaanxi	34.15	108.55	5	13.96	15.14	7.51	19.22	1.57	Dai (2018)
Shaanxi	34.15	108.54	5	16.01	17.48	8.94	19.47	1.91	Dai (2018)
Shaanxi	34.09	108.55	5	15.33	17.42	8.7	19.57	1.79	Dai (2018)
Shaanxi	34.2	108.56	5	16	17.34	8.67	19.94	2.25	Dai (2018)
Shaanxi	34.39	109.13	5	15.42	16.79	8.9	19.55	1.68	Dai (2018)
Shaanxi	34	108.44	5	12.31	12.78	6.7	12.85	1.3	Dai (2018)
Shandong	36.07	120.38	30	16.97	9.25	9.52	13.59	2.69	Cao (2012); Wu (2017)
Shandong	36.6564	117.057	15	28.85	15	16.7	NaN	NaN	Yang (2007); Cheng (2011)
Shandong	36.6983	116.916	25	18.31	5.73	17.69	20.14	4.25	Cheng (2011); Yang (2012)
Shandong	36.4	117.02	32	34.35	14.31	20.54	22.62	4.14	Yang (2012); Cheng (2011); Zhu (2015)
Shandong	36.18	117	6	11.49	5.73	5.22	NaN	NaN	Deng (2011)
Shandong	36.74	117.07	3	38.3	15.8	21.3	NaN	NaN	Gao (2011)
Shandong	36.67	117.12	2	NaN	NaN	NaN	16	5.3	Gu (2014)
Shandong	38	120.7	5	12.5	18.2	8.3	6.9	1.9	Zheng (2016)
Shandong	38.188	120.741	25	10.1	7.09	2.68	4.5	2.13	Wang (2017b)
Shandong	37.21	116.28	20	19.2	18.53	12.78	22.15	2.15	Chen (2017)
Shandong	36.17	117.15	5	22.46	0.24	8.69	8.37	1.3	Liu (2016)
Shandong	36.1914	117.128	15	18.64	0.33	8.61	9.12	3.15	Liu (2016)
Shandong	36.18	117.11	5	24.41	0.21	7.55	4.64	0.89	Liu (2016)
Shandong	36.2	117.09	5	16.64	0.34	9.69	10.75	3.59	Liu (2016)
Shandong	38.24	120.55	20	11.3	6.47	4.92	4.87	2.26	Zong (2018)
Shanghai	31.2535	121.486	5	13	5.78	5.66	16.8	6.49	Huang (2014)
Shanghai	31.5676	121.497	5	13.48	5.77	5.67	14.34	6.21	Ye (2003)
Shanghai	31.17	121.43	77	10.56	9	6.04	9.81	2.44	Yao (2002); Feng (2006); Qiao (2014); Wang (2016a); Wang (2016)
Shanghai	31.23	121.47	18	14.9	8.38	6.5	19	7.3	Cao (2012); Wang (2006b); Pathak (2011)
Shanghai	31.33	121.35	6	7	4.1	3.3	16.1	2.65	Feng (2009); Lin (2014)
Shanghai	31.62	121.4	11	12.35	7.76	6.23	9.9	1.6	Li (2010); Huang (2013)
Shanghai	31.84	121.25	10	12.32	10.14	4.82	12.32	3.05	Zhao (2015)
Shanghai	31.14	121.32	5	24.3	29.6	14.9	20.8	5.8	Hua (2015)
Shanghai	31.14	121.33	5	6.6	3.9	3	5.375	1.9	Hua (2015)
Shanghai	31.22	121.48	5	13.6	11.9	5.8	10.7	2	Liu (2018b)
Shanghai	31.8	121.25	25	13.11	15.28	7.76	11.56	3.53	Zhao (2016); Ming (2017)
Shanghai	31.3	121.5	27	9.27	5.35	5.81	5.98	2.63	Tao (2016); Zhao (2016); Ming (2017)
Shanxi	37.87	112.55	8	NaN	NaN	NaN	33.3	18.03	He (2015)
Shanxi	37.8	112.58	2	35.1	12.1	NaN	NaN	NaN	Jia (2013)
Sichuan	30.394	104	45	26.19	11.66	7	29.27	6.7	Tao (2013b); Wang (2013); Chen (2014)
Sichuan	30.66	104	5	33	20	10.4	22.3	9	Tao (2013a)
Sichuan	30.65	104.03	30	15.73	11.37	8.98	13.08	4.17	Tao (2014a); Li (2017a); Wang (2018)
Sichuan	30.2	104.6	5	15.6	13.2	9.8	16.5	5.4	Zheng (2016)
Sichuan	29.38	104	5	12.4	3	4.9	6.5	0.7	Zhang (2014a)
Sichuan	30.394	104.6	15	12.77	5.27	5.53	7.23	0.63	Zhang (2014a)
Sichuan	31.1	104.39	5	21.6	10.2	6.3	13.8	1.4	Zhou (2016b)
Sichuan	29.51	101.98	5	4.7	0.4	1.7	8.2	1.1	Liu (2018b)
Sichuan	30.36	104.6	5	17.42	12.6	9.28	16.5	4.36	Chen (2019)
Sichuan	29.42	105.4	5	16.91	8.31	8.02	14.3	3.95	Chen (2019)
Sichuan	29.37	106.3	5	17.5	15.8	11.3	24.2	5.9	Wang (2018)
Tianjin	39.06	117.1	35	22.29	16.91	10.55	23.59	6.22	Cao (2012); Gu (2011); Zhao (2013a); Tian (2016); Gao (2018)
Tianjin	39.1	117.2	4	NaN	7.6	4.9	16.9	5.7	Gu (2010); Wei (2012)
Tianjin	39.4	117	5	26.9	14.1	14.5	7.2	2.8	Tian (2016)
Tianjin	39.39	117.39	10	20.35	16.75	7.3	11.55	1.5	Zhou (2016b)
Tibet	29.68	94.37	5	1.07	0.21	NaN	4.28	0.52	Zhao (2013b)
Tibet	38.5	96.51	15	1.43	0.38	0.22	NaN	NaN	Xu (2014)
Tibet	27.1	100.2	5	2.2	0.6	0.41	1.84	0.55	Zhang (2018)
Tibet	29.67	91.33	5	0.8	0.5	0.4	7.875	1.4	Liu (2018b)
Tibet	30.77	90.98	5	0.4	0.1	0.4	2.125	0.2	Liu (2018b)
Xinjiang	43.83	87.6	5	33.1	13.2	13.3	25.2	5.5	Liu (2015b)
Xinjiang	44.19	84.53	10	19.01	11.21	8.53	7.22	1.55	Turap (2019)
Yunnan	27.1	100.2	5	2.2	0.6	0.41	1.84	0.55	Zhang (2018)
Zhejiang	30.13	120.9	20	21.9	15.45	11.85	21.03	6.78	Cao (2012); Hua (2015)
Zhejiang	30.24	120.12	5	12.8	5.9	5.3	NaN	NaN	Bao (2010)
Zhejiang	30.27	120.2	5	16.8	7.6	7.8	NaN	NaN	Liu (2015a)
Zhejiang	30.28	120.17	6	17.1	8.6	10.2	NaN	NaN	Liu (2015a)
Zhejiang	30.18	119.44	43	16.72	8.37	5.89	11.27	2.45	Yan (2012); Feng (2015); Zhang (2017); Deng (2018)
Zhejiang	29.85	121.583	5	10.52	6.155	NaN	19.7	NaN	Ye (2011)
Zhejiang	29.9333	121.65	5	9.913	5.649	NaN	17.2	NaN	Ye (2011)
Zhejiang	29.9	121.85	5	10.583	5.588	NaN	22.4	NaN	Ye (2011)
Zhejiang	29.1	119.7	5	18.3	12.6	10.4	11.4	5.2	Zheng (2016)
Zhejiang	28.4	121.6	5	12.1	7.2	6.4	8.1	2.1	Zheng (2016)
Zhejiang	29.53	121.33	10	11.7	9.95	7.65	15.35	5.9	Hua (2015)
Zhejiang	29.88	121.55	16	16.73	9.46	6.55	12.55	3.75	Li (2017b); Xu (2016b)
Zhejiang	30.17	121.23	10	10.95	7	6.55	8.3	3.1	Li (2017b)
Zhejiang	30.03	121.15	5	11.1	5.8	6.2	7	1.8	Li (2017b)
Zhejiang	30.51	120.69	5	16.5	13.9	6.1	9	1.4	Zhou (2016b)
Zhejiang	29.8	121.56	5	8.1	10.6	5	NaN	NaN	Xu (2017)
Zhejiang	29.86	121.52	5	10.7	10.3	9.4	NaN	NaN	Xu (2017)
Zhejiang	30.3	119.73	5	12.5	15.2	10.2	NaN	NaN	Xu (2017)
Zhejiang	30.22	120.17	5	16.5	21.9	13.5	NaN	NaN	Xu (2017)
Reference
Al-Naiema, I. M., Yoon, S., Wang, Y.-Q., Zhang, Y.-X., Sheesley, R. J., and Stone, E. A.: Source apportionment of fine particulate matter organic carbon in Shenzhen, China by chemical mass balance and radiocarbon methods, Environ. Pollut. Control, 240, 34-43, https://doi.org/10.1016/j.envpol.2018.04.071, 2018.
Bao, Z., Feng, Y., Jiao, L., Hong, S., and Liu, W.: Characterization and Source Apportionment of PM2.5 and PM10 in Hangzhou, Environ. Monit. China, 26, 44-48, https://doi.org/10.19316/j.issn.1002-6002.2010.02.012, 2010.
Cao, J.-J., Shen, Z.-X., Chow, J. C., Watson, J. G., Lee, S.-C., Tie, X.-X., Ho, K.-F., Wang, G.-H., and Han, Y.-M.: Winter and Summer PM2.5 Chemical Compositions in Fourteen Chinese Cities, J. Air. Waste Manag. Assoc., 62, 1214-1226, https://doi.org/10.1080/10962247.2012.701193, 2012.
Cao, J. J., Wu, F., Chow, J. C., Lee, S. C., Li, Y., Chen, S. W., An, Z. S., Fung, K. K., Watson, J. G., Zhu, C. S., and Liu, S. X.: Characterization and source apportionment of atmospheric organic and elemental carbon during fall and winter of 2003 in Xi'an, China, Atmos. Chem. Phys., 5, 3127-3137, https://doi.org/10.5194/acp-5-3127-2005, 2005.
Chen, B., Du, K., Wang, Y., Chen, J., Zhao, J., Wang, K., Zhang, F., and Xu, L.: Emission and Transport of Carbonaceous Aerosols in Urbanized Coastal Areas in China, Aerosol Air Qual. Res., 12, 371-378, https://doi.org/10.4209/aaqr.2011.08.0131, 2012.
Chen, D., Liu, X., Lang, J., Zhou, Y., Wei, L., Wang, X., and Guo, X.: Estimating the contribution of regional transport to PM2.5 air pollution in a rural area on the North China Plain, Sci. Total Environ., 583, 280-291, https://doi.org/10.1016/j.scitotenv.2017.01.066, 2017.
Chen, K., Yin, Y., Wei, Y., and Yang, W.: Characteristics of carbonaceous aerosols in PM2.5 in Nanjing, China Environ. Sci., 30, 1015-1020, 2010.
Chen, W., Tong, D., Zhang, S., Dan, M., Zhang, X., and Zhao, H.: Temporal variability of atmospheric particulate matter and chemical composition during a growing season at an agricultural site in northeastern China, J. Environ. Sci., 38, 133-141, https://doi.org/10.1016/j.jes.2015.05.023, 2015.
Chen, Y. and Xie, S.-d.: Characteristics and formation mechanism of a heavy air pollution episode caused by biomass burning in Chengdu, Southwest China, Sci. Total Environ., 473-474, 507-517, https://doi.org/10.1016/j.scitotenv.2013.12.069, 2014.
Chen, Y., Xie, S.-d., Luo, B., and Zhai, C.: Characteristics and Sources of Water-Soluble Ions in PM2.5 in the Sichuan Basin, China, https://doi.org/10.3390/atmos10020078, 2019.
Cheng, H., Wang, Z., Feng, J., Chen, H., Zhang, F., and Liu, J.: Carbonaceous species composition and source apportionment of PM_(2.5) in urban atmosphere of Wuhan, Ecol. Environ. Sci., 21, 1574-1579, https://doi.org/10.16258/j.cnki.1674-5906.2012.09.015, 2012.
Cheng, S., Yang, L., Zhou, X., Wang, Z., Zhou, Y., Gao, X., Nie, W., Wang, X., Xu, P., and Wang, W.: Evaluating PM2.5 ionic components and source apportionment in Jinan, China from 2004 to 2008 using trajectory statistical methods, J. Environ. Manage., 13, 1662-1671, https://doi.org/10.1039/C0EM00756K, 2011.
Cui, H., Chen, W., Dai, W., Liu, H., Wang, X., and He, K.: Source apportionment of PM2.5 in Guangzhou combining observation data analysis and chemical transport model simulation, Atmos. Environ., 116, 262-271, https://doi.org/10.1016/j.atmosenv.2015.06.054, 2015.
Dai, Q., Bi, X., Liu, B., Li, L., Ding, J., Song, W., Bi, S., Schulze, B. C., Song, C., Wu, J., Zhang, Y., Feng, Y., and Hopke, P. K.: Chemical nature of PM2.5 and PM10 in Xi'an, China: Insights into primary emissions and secondary particle formation, Environ. Pollut. Control, 240, 155-166, https://doi.org/10.1016/j.envpol.2018.04.111, 2018.
Dai, W., Gao, J., Cao, G., and Ouyang, F.: Chemical composition and source identification of PM2.5 in the suburb of Shenzhen, China, Atmos. Res., 122, 391-400, https://doi.org/10.1016/j.atmosres.2012.12.004, 2013.
Deng, C., Zhuang, G., Huang, K., Li, J., Zhang, R., Wang, Q., Liu, T., Sun, Y., Guo, Z., Fu, J. S., and Wang, Z.: Chemical characterization of aerosols at the summit of Mountain Tai in Central East China, Atmos. Chem. Phys., 11, 7319-7332, https://doi.org/10.5194/acp-11-7319-2011, 2011.
Deng, J., Zhang, Y., Qiu, Y., Zhang, H., Du, W., Xu, L., Hong, Y., Chen, Y., and Chen, J.: Source apportionment of PM2.5 at the Lin'an regional background site in China with three receptor models, Atmos. Res., 202, 23-32, https://doi.org/10.1016/j.atmosres.2017.11.017, 2018.
Ding, X., Wang, X.-M., and Zheng, M.: The influence of temperature and aerosol acidity on biogenic secondary organic aerosol tracers: Observations at a rural site in the central Pearl River Delta region, South China, Atmos. Environ., 45, 1303-1311, https://doi.org/10.1016/j.atmosenv.2010.11.057, 2011.
Duan, F. K., He, K. B., Ma, Y. L., Yang, F. M., Yu, X. C., Cadle, S. H., Chan, T., and Mulawa, P. A.: Concentration and chemical characteristics of PM2.5 in Beijing, China: 2001–2002, Sci. Total Environ., 355, 264-275, https://doi.org/10.1016/j.scitotenv.2005.03.001, 2006.
Fang, X., Bi, X., Xu, H., Wu, J., Zhang, Y., and Feng, Y.: Source apportionment of ambient PM10 and PM2.5 in Haikou, China, Atmos. Res., 190, 1-9, https://doi.org/10.1016/j.atmosres.2017.01.021, 2017.
Feng, J., Yu, H., Liu, S., Su, X., Li, Y., Pan, Y., and Sun, J.: PM2.5 levels, chemical composition and health risk assessment in Xinxiang, a seriously air-polluted city in North China, Environ. Geochem. Health, 39, 1071-1083, https://doi.org/10.1007/s10653-016-9874-5, 2017.
Feng, J., Hu, J., Xu, B., Hu, X., Sun, P., Han, W., Gu, Z., Yu, X., and Wu, M.: Characteristics and seasonal variation of organic matter in PM2.5 at a regional background site of the Yangtze River Delta region, China, Atmos. Environ., 123, 288-297, https://doi.org/10.1016/j.atmosenv.2015.08.019, 2015.
Feng, Y., Chen, Y., Guo, H., Zhi, G., Xiong, S., Li, J., Sheng, G., and Fu, J.: Characteristics of organic and elemental carbon in PM2.5 samples in Shanghai, China, Atmos. Res., 92, 434-442, https://doi.org/10.1016/j.atmosres.2009.01.003, 2009.
Fu, X., Wang, X., Guo, H., Cheung, K., Ding, X., Zhao, X., He, Q., Gao, B., Zhang, Z., Liu, T., and Zhang, Y.: Trends of ambient fine particles and major chemical components in the Pearl River Delta region: Observation at a regional background site in fall and winter, Sci. Total Environ., 497-498, 274-281, https://doi.org/10.1016/j.scitotenv.2014.08.008, 2014.
Gao, J., Wang, K., Wang, Y., Liu, S., Zhu, C., Hao, J., Liu, H., Hua, S., and Tian, H.: Temporal-spatial characteristics and source apportionment of PM2.5 as well as its associated chemical species in the Beijing-Tianjin-Hebei region of China, Environ. Pollut. Control, 233, 714-724, https://doi.org/10.1016/j.envpol.2017.10.123, 2018.
Gao, X., Yang, L., Cheng, S., Gao, R., Zhou, Y., Xue, L., Shou, Y., Wang, J., Wang, X., Nie, W., Xu, P., and Wang, W.: Semi-continuous measurement of water-soluble ions in PM2.5 in Jinan, China: Temporal variations and source apportionments, Atmos. Environ., 45, 6048-6056, https://doi.org/10.1016/j.atmosenv.2011.07.041, 2011.
Geng, N., Wang, J., Xu, Y., Zhang, W., Chen, C., and Zhang, R.: PM2.5 in an industrial district of Zhengzhou, China: Chemical composition and source apportionment, Particuology, 11, 99-109, https://doi.org/10.1016/j.partic.2012.08.004, 2013.
Gu, J., Bai, Z., Li, W., Wu, L., Liu, A., Dong, H., and Xie, Y.: Chemical composition of PM2.5 during winter in Tianjin, China, Particuology, 9, 215-221, https://doi.org/10.1016/j.partic.2011.03.001, 2011.
Gu, J., Bai, Z., Liu, A., Wu, L., Xie, Y., Li, W., Dong, H., and Zhang, X.: Characterization of Atmospheric Organic Carbon and Element Carbon of PM2.5 and PM10 at Tianjin, China, Aerosol Air Qual. Res., 10, 167-176, https://doi.org/10.4209/aaqr.2009.12.0080, 2010.
Gu, J., Du, S., Han, D., Hou, L., Yi, J., Xu, J., Liu, G., Han, B., Yang, G., and Bai, Z.-P.: Major chemical compositions, possible sources, and mass closure analysis of PM2.5 in Jinan, China, Air Qual. Atmos. Health, 7, 251-262, https://doi.org/10.1007/s11869-013-0232-9, 2014.
Hagler, G. S. W., Bergin, M. H., Salmon, L. G., Yu, J. Z., Wan, E. C. H., Zheng, M., Zeng, L. M., Kiang, C. S., Zhang, Y. H., Lau, A. K. H., and Schauer, J. J.: Source areas and chemical composition of fine particulate matter in the Pearl River Delta region of China, Atmos. Environ., 40, 3802-3815, https://doi.org/10.1016/j.atmosenv.2006.02.032, 2006.
He, K., Zhao, Q., Ma, Y., Duan, F., Yang, F., Shi, Z., and Chen, G.: Spatial and seasonal variability of PM2.5 acidity at two Chinese megacities: insights into the formation of secondary inorganic aerosols, Atmos. Chem. Phys., 12, 1377-1395, https://doi.org/10.5194/acp-12-1377-2012, 2012.
He, K., Yang, F., Ma, Y., Zhang, Q., Yao, X., Chan, C. K., Cadle, S., Chan, T., and Mulawa, P.: The characteristics of PM2.5 in Beijing, China, Atmos. Environ., 35, 4959-4970, https://doi.org/10.1016/S1352-2310(01)00301-6, 2001.
He, Q., Guo, W., Zhang, G., Yan, Y., and Chen, L.: Characteristics and Seasonal Variations of Carbonaceous Species in PM2.5 in Taiyuan, China, Atmosphere, 6, 850-862, 2015.
Ho, K.-F., Ho, S. S. H., Huang, R.-J., Chuang, H.-C., Cao, J.-J., Han, Y., Lui, K.-H., Ning, Z., Chuang, K.-J., Cheng, T.-J., Lee, S.-C., Hu, D., Wang, B., and Zhang, R.: Chemical composition and bioreactivity of PM2.5 during 2013 haze events in China, Atmos. Environ., 126, 162-170, https://doi.org/10.1016/j.atmosenv.2015.11.055, 2016.
Ho, K. F., Cao, J. J., Lee, S. C., and Chan, C. K.: Source apportionment of PM2.5 in urban area of Hong Kong, J. Hazard. Mater., 138, 73-85, https://doi.org/10.1016/j.jhazmat.2006.05.047, 2006.
Ho, K. F., Lee, S. C., Chan, C. K., Yu, J. C., Chow, J. C., and Yao, X. H.: Characterization of chemical species in PM2.5 and PM10 aerosols in Hong Kong, Atmos. Environ., 37, 31-39, https://doi.org/10.1016/S1352-2310(02)00804-X, 2003.
Hua, Y., Cheng, Z., Wang, S., Jiang, J., Chen, D., Cai, S., Fu, X., Fu, Q., Chen, C., Xu, B., and Yu, J.: Characteristics and source apportionment of PM2.5 during a fall heavy haze episode in the Yangtze River Delta of China, Atmos. Environ., 123, 380-391, https://doi.org/10.1016/j.atmosenv.2015.03.046, 2015.
Huang, K., Zhuang, G., Lin, Y., Wang, Q., Fu, J. S., Fu, Q., Liu, T., and Deng, C.: How to improve the air quality over megacities in China: pollution characterization and source analysis in Shanghai before, during, and after the 2010 World Expo, Atmos. Chem. Phys., 13, 5927-5942, https://doi.org/10.5194/acp-13-5927-2013, 2013.
Huang, T., Chen, J., Zhao, W., Cheng, J., and Cheng, S.: Seasonal Variations and Correlation Analysis of Water-Soluble Inorganic Ions in PM2.5 in Wuhan, 2013, Atmosphere, 7, 49, https://doi.org/10.3390/atmos7040049, 2016.
Huang, W., Cao, J., Tao, Y., Dai, L., Lu, S.-E., Hou, B., Wang, Z., and Zhu, T.: Seasonal Variation of Chemical Species Associated With Short-Term Mortality Effects of PM2.5 in Xi’an, a Central City in China, Am. J. Epidemiol., 175, 556-566, https://doi.org/10.1093/aje/kwr342, 2012.
Huang, X., Yun, H., Gong, Z., Li, X., He, L., Zhang, Y., and Hu, M.: Source apportionment and secondary organic aerosol estimation of PM2.5 in an urban atmosphere in China, Sci. China Earth Sci., 57, 1352-1362, https://doi.org/10.1007/s11430-013-4686-2, 2014.
Huang, Y., Liu, Y., Zhang, L., Peng, C., and Yang, F.: Characteristics of Carbonaceous Aerosol in PM2.5 at Wanzhou in the Southwest of China, https://doi.org/10.3390/atmos9020037, 2018.
Jia, X., Jie, J., Ma, X., Di, Z., and Wu, Y.: Analysis of water-soluble constituents in winter of PM2.5 in Taiyuan City, China Environ. Sci., 33, 599-604, 2013.
Jiang, N., Duan, S., Yu, X., Zhang, R., and Wang, K.: Comparative major components and health risks of toxic elements and polycyclic aromatic hydrocarbons of PM2.5 in winter and summer in Zhengzhou: Based on three-year data, Atmos. Res., 213, 173-184, https://doi.org/10.1016/j.atmosres.2018.06.008, 2018.
Kim Oanh, N. T., Upadhyay, N., Zhuang, Y. H., Hao, Z. P., Murthy, D. V. S., Lestari, P., Villarin, J. T., Chengchua, K., Co, H. X., Dung, N. T., and Lindgren, E. S.: Particulate air pollution in six Asian cities: Spatial and temporal distributions, and associated sources, Atmos. Environ., 40, 3367-3380, https://doi.org/10.1016/j.atmosenv.2006.01.050, 2006.
Kong, S. F., Li, L., Li, X. X., Yin, Y., Chen, K., Liu, D. T., Yuan, L., Zhang, Y. J., Shan, Y. P., and Ji, Y. Q.: The impacts of firework burning at the Chinese Spring Festival on air quality: insights of tracers, source evolution and aging processes, Atmos. Chem. Phys., 15, 2167-2184, https://doi.org/10.5194/acp-15-2167-2015, 2015.
Lai, S.-c., Zou, S.-c., Cao, J.-j., Lee, S.-c., and Ho, K.-f.: Characterizing ionic species in PM2.5 and PM10 in four Pearl River Delta cities, South China, J. Environ. Sci., 19, 939-947, https://doi.org/10.1016/S1001-0742(07)60155-7, 2007.
Lai, S., Zhao, Y., Ding, A., Zhang, Y., Song, T., Zheng, J., Ho, K. F., Lee, S.-c., and Zhong, L.: Characterization of PM2.5 and the major chemical components during a 1-year campaign in rural Guangzhou, Southern China, Atmos. Res., 167, 208-215, https://doi.org/10.1016/j.atmosres.2015.08.007, 2016.
Li, H., Wang, Q. g., Yang, M., Li, F., Wang, J., Sun, Y., Wang, C., Wu, H., and Qian, X.: Chemical characterization and source apportionment of PM2.5 aerosols in a megacity of Southeast China, Atmos. Res., 181, 288-299, https://doi.org/10.1016/j.atmosres.2016.07.005, 2016.
Li, J., Song, Y., Mao, Y., Mao, Z., Wu, Y., Li, M., Huang, X., He, Q., and Hu, M.: Chemical characteristics and source apportionment of PM2.5 during the harvest season in eastern China's agricultural regions, Atmos. Environ., 92, 442-448, https://doi.org/10.1016/j.atmosenv.2014.04.058, 2014.
Li, J., Wang, G., Wang, X., Cao, J., Sun, T., Cheng, C., Meng, J., Hu, T., and Liu, S.: Abundance, composition and source of atmospheric PM 2.5 at a remote site in the Tibetan Plateau, China, Tellus B, 65, https://doi.org/10.3402/tellusb.v65i0.20281, 2013.
Li, L., Tan, Q., Zhang, Y., Feng, M., Qu, Y., An, J., and Liu, X.: Characteristics and source apportionment of PM2.5 during persistent extreme haze events in Chengdu, southwest China, Environ. Pollut. Control, 230, 718-729, https://doi.org/10.1016/j.envpol.2017.07.029, 2017a.
Li, L., Wang, W., Feng, J., Zhang, D., Li, H., Gu, Z., Wang, B., Sheng, G., and Fu, J.: Composition, source, mass closure of PM2.5 aerosols for four forests in eastern China, J. Environ. Sci., 22, 405-412, https://doi.org/10.1016/S1001-0742(09)60122-4, 2010.
Li, M., Hu, M., Du, B., Guo, Q., Tan, T., Zheng, J., Huang, X., He, L., Wu, Z., and Guo, S.: Temporal and spatial distribution of PM2.5 chemical composition in a coastal city of Southeast China, Sci. Total Environ., 605-606, 337-346, https://doi.org/10.1016/j.scitotenv.2017.03.260, 2017b.
Li, X., Jiang, L., Bai, Y., Yang, Y., Liu, S., Chen, X., Xu, J., Liu, Y., Wang, Y., Guo, X., Wang, Y., and Wang, G.: Wintertime aerosol chemistry in Beijing during haze period: Significant contribution from secondary formation and biomass burning emission, Atmos. Res., 218, 25-33, https://doi.org/10.1016/j.atmosres.2018.10.010, 2019.
Lin, Y., Huang, K., Zhuang, G., Fu, J. S., Wang, Q., Liu, T., Deng, C., and Fu, Q.: A multi-year evolution of aerosol chemistry impacting visibility and haze formation over an Eastern Asia megacity, Shanghai, Atmos. Environ., 92, 76-86, https://doi.org/10.1016/j.atmosenv.2014.04.007, 2014.
Liu, B., Song, N., Dai, Q., Mei, R., Sui, B., Bi, X., and Feng, Y.: Chemical composition and source apportionment of ambient PM2.5 during the non-heating period in Taian, China, Atmos. Res., 170, 23-33, https://doi.org/10.1016/j.atmosres.2015.11.002, 2016.
Liu, B., Zhang, J., Wang, L., Liang, D., Cheng, Y., Wu, J., Bi, X., Feng, Y., Zhang, Y., and Yang, H.: Characteristics and sources of the fine carbonaceous aerosols in Haikou, China, Atmos. Res., 199, 103-112, https://doi.org/10.1016/j.atmosres.2017.08.022, 2018a.
Liu, G., Li, J., Wu, D., and Xu, H.: Chemical composition and source apportionment of the ambient PM2.5 in Hangzhou, China, Particuology, 18, 135-143, https://doi.org/10.1016/j.partic.2014.03.011, 2015a.
Liu, J., Wu, D., Fan, S., Mao, X., and Chen, H.: A one-year, on-line, multi-site observational study on water-soluble inorganic ions in PM2.5 over the Pearl River Delta region, China, Sci. Total Environ., 601-602, 1720-1732, https://doi.org/10.1016/j.scitotenv.2017.06.039, 2017.
Liu, X., Chen, H., Zhao, K., Zhong, Y., and Yan, J.: Analysis the Effect and Source on Water-Soluble Ions of Fine Particulate Matter (PM2.5) in Urumqi, Ecol. Environ. Sci., 24, 2002-2008, https://doi.org/10.16258/j.cnki.1674-5906.2015.12.012, 2015b.
Liu, Y.-J., Zhang, T.-T., Liu, Q.-Y., Zhang, R.-J., Sun, Z.-Q., and Zhang, M.-G.: Seasonal Variation of Physical and Chemical Properties in TSP, PM10 and PM2.5 at a Roadside Site in Beijing and Their Influence on Atmospheric Visibility, Aerosol Air Qual. Res., 14, 954-969, https://doi.org/10.4209/aaqr.2013.01.0023, 2014.
Liu, Z., Gao, W., Yu, Y., Hu, B., Xin, J., Sun, Y., Wang, L., Wang, G., Bi, X., Zhang, G., Xu, H., Cong, Z., He, J., Xu, J., and Wang, Y.: Characteristics of PM2.5 mass concentrations and chemical species in urban and background areas of China: emerging results from the CARE-China network, Atmos. Chem. Phys., 18, 8849-8871, https://doi.org/10.5194/acp-18-8849-2018, 2018b.
Ma, Y., Wang, Z., Tan, Y., Xu, S., Kong, S., Wu, G., Wu, X., and Li, H.: Comparison of inorganic chemical compositions of atmospheric TSP, PM10 and PM2.5 in northern and southern Chinese coastal cities, J. Environ. Sci., 55, 339-353, https://doi.org/10.1016/j.jes.2016.05.045, 2017.
Ming, L., Jin, L., Li, J., Fu, P., Yang, W., Liu, D., Zhang, G., Wang, Z., and Li, X.: PM2.5 in the Yangtze River Delta, China: Chemical compositions, seasonal variations, and regional pollution events, Environ. Pollut. Control, 223, 200-212, https://doi.org/10.1016/j.envpol.2017.01.013, 2017.
Niu, X., Cao, J., Shen, Z., Ho, S. S. H., Tie, X., Zhao, S., Xu, H., Zhang, T., and Huang, R.: PM2.5 from the Guanzhong Plain: Chemical composition and implications for emission reductions, Atmos. Environ., 147, 458-469, https://doi.org/10.1016/j.atmosenv.2016.10.029, 2016.
Pathak, R. K., Wang, T., Ho, K. F., and Lee, S. C.: Characteristics of summertime PM2.5 organic and elemental carbon in four major Chinese cities: Implications of high acidity for water-soluble organic carbon (WSOC), Atmos. Environ., 45, 318-325, https://doi.org/10.1016/j.atmosenv.2010.10.021, 2011.
Qiao, L., Cai, J., Wang, H., Wang, W., Zhou, M., Lou, S., Chen, R., Dai, H., Chen, C., and Kan, H.: PM2.5 constituents and hospital emergency-room visits in Shanghai, China, Environ. Sci. Technol., 48, 10406-10414, https://doi.org/10.1021/es501305k, 2014.
Shen, R., Schäfer, K., Shao, L., Schnelle-Kreis, J., Wang, Y., Li, F., Liu, Z., Emeis, S., and Schmid, H. P.: Chemical characteristics of PM2.5 during haze episodes in spring 2013 in Beijing, Urban Clima., 22, 51-63, https://doi.org/10.1016/j.uclim.2016.01.003, 2017.
Shen, Z., Arimoto, R., Cao, J., Zhang, R., Li, X., Du, N., Okuda, T., Nakao, S., and Tanaka, S.: Seasonal Variations and Evidence for the Effectiveness of Pollution Controls on Water-Soluble Inorganic Species in Total Suspended Particulates and Fine Particulate Matter from Xi’an, China, J. Air. Waste Manag. Assoc., 58, 1560-1570, https://doi.org/10.3155/1047-3289.58.12.1560, 2008.
Song, S., Wu, Y., Jiang, J., Yang, L., Cheng, Y., and Hao, J.: Chemical characteristics of size-resolved PM2.5 at a roadside environment in Beijing, China, Environ. Pollut. Control, 161, 215-221, https://doi.org/10.1016/j.envpol.2011.10.014, 2012.
Sun, Y., Zhuang, G., Wang, Y., Han, L., Guo, J., Dan, M., Zhang, W., Wang, Z., and Hao, Z.: The air-borne particulate pollution in Beijing—concentration, composition, distribution and sources, Atmos. Environ., 38, 5991-6004, https://doi.org/10.1016/j.atmosenv.2004.07.009, 2004.
Tan, J., Duan, J., He, K., Ma, Y., Duan, F., Chen, Y., and Fu, J.: Chemical characteristics of PM2.5 during a typical haze episode in Guangzhou, J. Environ. Sci., 21, 774-781, https://doi.org/10.1016/S1001-0742(08)62340-2, 2009.
Tan, J., Duan, J., Ma, Y., He, K., Cheng, Y., Deng, S.-x., Huang, Y.-l., and Si-Tu, S.-p.: Long-term trends of chemical characteristics and sources of fine particle in Foshan City, Pearl River Delta: 2008–2014, Sci. Total Environ., 565, 519-528, https://doi.org/10.1016/j.scitotenv.2016.05.059, 2016a.
Tan, J., Xiang, P., Zhou, X., Duan, J., Ma, Y., He, K., Cheng, Y., Yu, J., and Querol, X.: Chemical characterization of humic-like substances (HULIS) in PM2.5 in Lanzhou, China, Sci. Total Environ., 573, 1481-1490, https://doi.org/10.1016/j.scitotenv.2016.08.025, 2016b.
Tao, J., Cheng, T., Zhang, R., Cao, J., Zhu, L., Wang, Q., Luo, L., and Zhang, L.: Chemical composition of PM2.5 at an urban site of Chengdu in southwestern China, Adv. Atmos. Sci., 30, 1070-1084, https://doi.org/10.1007/s00376-012-2168-7, 2013a.
Tao, J., Zhang, L., Engling, G., Zhang, R., Yang, Y., Cao, J., Zhu, C., Wang, Q., and Luo, L.: Chemical composition of PM2.5 in an urban environment in Chengdu, China: Importance of springtime dust storms and biomass burning, Atmos. Res., 122, 270-283, https://doi.org/10.1016/j.atmosres.2012.11.004, 2013b.
Tao, J., Gao, J., Zhang, L., Zhang, R., Che, H., Zhang, Z., Lin, Z., Jing, J., Cao, J., and Hsu, S. C.: PM2.5 pollution in a megacity of southwest China: source apportionment and implication, Atmos. Chem. Phys., 14, 8679-8699, https://doi.org/10.5194/acp-14-8679-2014, 2014a.
Tao, J., Zhang, L., Ho, K., Zhang, R., Lin, Z., Zhang, Z., Lin, M., Cao, J., Liu, S., and Wang, G.: Impact of PM2.5 chemical compositions on aerosol light scattering in Guangzhou — the largest megacity in South China, Atmos. Res., 135-136, 48-58, https://doi.org/10.1016/j.atmosres.2013.08.015, 2014b.
Tao, J., Zhang, L., Cao, J., Zhong, L., Chen, D., Yang, Y., Chen, D., Chen, L., Zhang, Z., Wu, Y., Xia, Y., Ye, S., and Zhang, R.: Source apportionment of PM2.5 at urban and suburban areas of the Pearl River Delta region, south China - With emphasis on ship emissions, Sci. Total Environ., 574, 1559-1570, https://doi.org/10.1016/j.scitotenv.2016.08.175, 2017.
Tao, Y., Ye, X., Ma, Z., Xie, Y., Wang, R., Chen, J., Yang, X., and Jiang, S.: Insights into different nitrate formation mechanisms from seasonal variations of secondary inorganic aerosols in Shanghai, Atmos. Environ., 145, 1-9, https://doi.org/10.1016/j.atmosenv.2016.09.012, 2016.
Tian, Y.-Z., Chen, G., Wang, H.-T., Huang-Fu, Y.-Q., Shi, G.-L., Han, B., and Feng, Y.-C.: Source regional contributions to PM2.5 in a megacity in China using an advanced source regional apportionment method, Chemosphere, 147, 256-263, https://doi.org/10.1016/j.chemosphere.2015.12.132, 2016.
Turap, Y., Talifu, D., Wang, X., Abulizi, A., Maihemuti, M., Tursun, Y., Ding, X., Aierken, T., and Rekefu, S.: Temporal distribution and source apportionment of PM2.5 chemical composition in Xinjiang, NW-China, Atmos. Res., 218, 257-268, https://doi.org/10.1016/j.atmosres.2018.12.010, 2019.
Wang, G., Huang, L., Gao, S., Gao, S., and Wang, L.: Characterization of water-soluble species of PM10 and PM2.5 aerosols in urban area in Nanjing, China, Atmos. Environ., 36, 1299-1307, https://doi.org/10.1016/S1352-2310(01)00550-7, 2002.
Wang, H., Tian, M., Li, X., Chang, Q., Cao, J., Yang, F., Ma, Y., and He, K.: Chemical Composition and Light Extinction Contribution of PM2.5 in Urban Beijing for a 1-Year Period, Aerosol Air Qual. Res., 15, 2200-2211, https://doi.org/10.4209/aaqr.2015.04.0257, 2015a.
Wang, H., Tian, M., Chen, Y., Shi, G., Liu, Y., Yang, F., Zhang, L., Deng, L., Yu, J., Peng, C., and Cao, X.: Seasonal characteristics, formation mechanisms and source origins of PM2.5 in two megacities in Sichuan Basin, China, Atmos. Chem. Phys., 18, 865-881, https://doi.org/10.5194/acp-18-865-2018, 2018.
Wang, H. L., Qiao, L. P., Lou, S. R., Zhou, M., Ding, A. J., Huang, H. Y., Chen, J. M., Wang, Q., Tao, S. K., Chen, C. H., Li, L., and Huang, C.: Chemical composition of PM2.5 and meteorological impact among three years in urban Shanghai, China, J. Clean. Prod., 112, 1302-1311, https://doi.org/10.1016/j.jclepro.2015.04.099, 2016a.
Wang, L.-s.: Characteristics of atmospheric particulate pollution in sping in Nanjing City, China Environ. Sci., 2003.
Wang, L. L., Wang, S. L., Wang, X., Xu, Z., Zhou, S. Z., Yuan, C., Yu, Y. C., Wang, T., and Wang, W. X.: Characteristics of particulate matter pollution during August 2009 in Beijing, China Environ. Sci., 31, 553-560, 2011.
Wang, P., Cao, J.-j., Shen, Z.-x., Han, Y.-m., Lee, S.-c., Huang, Y., Zhu, C.-s., Wang, Q.-y., Xu, H.-m., and Huang, R.-j.: Spatial and seasonal variations of PM2.5 mass and species during 2010 in Xi'an, China, Sci. Total Environ., 508, 477-487, https://doi.org/10.1016/j.scitotenv.2014.11.007, 2015b.
Wang, Q., Jiang, N., Yin, S., Li, X., Yu, F., Guo, Y., and Zhang, R.: Carbonaceous species in PM2.5 and PM10 in urban area of Zhengzhou in China: Seasonal variations and source apportionment, Atmos. Res., 191, 1-11, https://doi.org/10.1016/j.atmosres.2017.02.003, 2017a.
Wang, Q., Cao, J., Shen, Z., Tao, J., Xiao, S., Luo, L., He, Q., and Tang, X.: Chemical characteristics of PM2.5 during dust storms and air pollution events in Chengdu, China, Particuology, 11, 70-77, https://doi.org/10.1016/j.partic.2012.08.001, 2013.
Wang, Q., Zhuang, G., Huang, K., Liu, T., Lin, Y., Deng, C., Fu, Q., Fu, J. S., Chen, J., Zhang, W., and Yiming, M.: Evolution of particulate sulfate and nitrate along the Asian dust pathway: Secondary transformation and primary pollutants via long-range transport, Atmos. Res., 169, 86-95, https://doi.org/10.1016/j.atmosres.2015.09.013, 2016b.
Wang, Q., Huang, X. H. H., Tam, F. C. V., Zhang, X., Liu, K. M., Yeung, C., Feng, Y., Cheng, Y. Y., Wong, Y. K., Ng, W. M., Wu, C., Zhang, Q., Zhang, T., Lau, N. T., Yuan, Z., Lau, A. K. H., and Yu, J. Z.: Source apportionment of fine particulate matter in Macao, China with and without organic tracers: A comparative study using positive matrix factorization, Atmos. Environ., 198, 183-193, https:/…
Wang, Q. Q., Huang, X. H. H., Zhang, T., Zhang, Q., Feng, Y., Yuan, Z., Wu, D., Lau, A. K. H., and Yu, J. Z.: Organic tracer-based source analysis of PM2.5 organic and elemental carbon: A case study at Dongguan in the Pearl River Delta, China, Atmos. Environ., 118, 164-175, https://doi.org/10.1016/j.atmosenv.2015.07.033, 2015c.
Wang, X., Bi, X., Sheng, G., and Fu, J.: Chemical Composition and Sources of PM10 and PM2.5 Aerosols in Guangzhou, China, Environ. Monit. Assess., 119, 425-439, https://doi.org/10.1007/s10661-005-9034-3, 2006a.
Wang, X., Zong, Z., Tian, C., Chen, Y., Luo, C., Li, J., Zhang, G., and Luo, Y.: Combining Positive Matrix Factorization and Radiocarbon Measurements for Source Apportionment of PM2.5 from a National Background Site in North China, Sci. Rep., 7, 10648, https://doi.org/10.1038/s41598-017-10762-8, 2017b.
Wang, Y., Zhuang, G., Tang, A., Yuan, H., Sun, Y., Chen, S., and Zheng, A.: The ion chemistry and the source of PM2.5 aerosol in Beijing, Atmos. Environ., 39, 3771-3784, https://doi.org/10.1016/j.atmosenv.2005.03.013, 2005.
Wang, Y., Zhuang, G., Zhang, X., Huang, K., Xu, C., Tang, A., Chen, J., and An, Z.: The ion chemistry, seasonal cycle, and sources of PM2.5 and TSP aerosol in Shanghai, Atmos. Environ., 40, 2935-2952, https://doi.org/10.1016/j.atmosenv.2005.12.051, 2006b.
Wang, Y., Jia, C., Tao, J., Zhang, L., Liang, X., Ma, J., Gao, H., Huang, T., and Zhang, K.: Chemical characterization and source apportionment of PM2.5 in a semi-arid and petrochemical-industrialized city, Northwest China, Sci. Total Environ., 573, 1031-1040, https://doi.org/10.1016/j.scitotenv.2016.08.179, 2016c.
Wei, X., Bi, X., Dong, H., Chen, K., Sun, R., and Feng, Y.: Characteristics and Sources of Particulate Matter during Hazy and Non-Hazy Episodes in Tianjin City in Summer, Res. Environ. Sci., 25, 1193-1200, https://doi.org/10.13198/j.res.2012.11.7.weix.007, 2012.
Wen, W., Cheng, S., Liu, L., Wang, G., and Wang, X.: Source apportionment of PM2.5 in Tangshan, China—Hybrid approaches for primary and secondary species apportionment, Front. Environ. Sci. Eng., 10, https://doi.org/10.1007/s11783-016-0839-9, 2016.
Wu, R., Zhou, X., Wang, L., Wang, Z., Zhou, Y., Zhang, J., and Wang, W.: PM2.5 Characteristics in Qingdao and across Coastal Cities in China, Atmosphere, 8, 77, 2017.
Wu, S.-P., Schwab, J., Yang, B.-Y., Zheng, A., and Yuan, C.-S.: Two-Years PM2.5 Observations at Four Urban Sites along the Coast of Southeastern China, Aerosol Air Qual. Res., 15, 1799-1812, https://doi.org/10.4209/aaqr.2015.05.0363, 2015.
Xiong, Y., Zhou, J., Schauer, J. J., Yu, W., and Hu, Y.: Seasonal and spatial differences in source contributions to PM2.5 in Wuhan, China, Sci. Total Environ., 577, 155-165, https://doi.org/10.1016/j.scitotenv.2016.10.150, 2017.
Xu, H., Cao, J., Chow, J. C., Huang, R. J., Shen, Z., Chen, L. W. A., Ho, K. F., and Watson, J. G.: Inter-annual variability of wintertime PM2.5 chemical composition in Xi'an, China: Evidences of changing source emissions, Sci. Total Environ., 545-546, 546-555, https://doi.org/10.1016/j.scitotenv.2015.12.070, 2016a.
Xu, J.-S., Xu, H.-H., Xiao, H., Tong, L., Snape, C. E., Wang, C.-J., and He, J.: Aerosol composition and sources during high and low pollution periods in Ningbo, China, Atmos. Res., 178-179, 559-569, https://doi.org/10.1016/j.atmosres.2016.05.006, 2016b.
Xu, J.-S., Xu, M.-X., Snape, C., He, J., Behera, S. N., Xu, H.-H., Ji, D.-S., Wang, C.-J., Yu, H., Xiao, H., Jiang, Y.-J., Qi, B., and Du, R.-G.: Temporal and spatial variation in major ion chemistry and source identification of secondary inorganic aerosols in Northern Zhejiang Province, China, Chemosphere, 179, 316-330, https://doi.org/10.1016/j.chemosphere.2017.03.119, 2017.
Xu, J., Wang, Z., Yu, G., Qin, X., Ren, J., and Qin, D.: Characteristics of water soluble ionic species in fine particles from a high altitude site on the northern boundary of Tibetan Plateau: Mixture of mineral dust and anthropogenic aerosol, Atmos. Res., 143, 43-56, https://doi.org/10.1016/j.atmosres.2014.01.018, 2014.
Xu, L., Chen, X., Chen, J., Zhang, F., He, C., Zhao, J., and Yin, L.: Seasonal variations and chemical compositions of PM2.5 aerosol in the urban area of Fuzhou, China, Atmos. Res., 104-105, 264-272, https://doi.org/10.1016/j.atmosres.2011.10.017, 2012.
Xu, W., Liu, X., Liu, L., Dore, A. J., Tang, A., Lu, L., Wu, Q., Zhang, Y., Hao, T., Pan, Y., Chen, J., and Zhang, F.: Impact of emission controls on air quality in Beijing during APEC 2014: Implications from water-soluble ions and carbonaceous aerosol in PM2.5 and their precursors, Atmos. Environ., 210, 241-252, https://doi.org/10.1016/j.atmosenv.2019.04.050, 2019.
Yan, P., Zhang, R., Huan, N., Zhou, X., Zhang, Y., Zhou, H., and Zhang, L.: Characteristics of aerosols and mass closure study at two WMO GAW regional background stations in eastern China, Atmos. Environ., 60, 121-131, https://doi.org/10.1016/j.atmosenv.2012.05.050, 2012.
Yang, F., Tan, J., Zhao, Q., Du, Z., He, K., Ma, Y., Duan, F., Chen, G., and Zhao, Q.: Characteristics of PM2.5 speciation in representative megacities and across China, Atmos. Chem. Phys., 11, 5207-5219, https://doi.org/10.5194/acp-11-5207-2011, 2011.
Yang, L.-x., Wang, D.-c., Cheng, S.-h., Wang, Z., Zhou, Y., Zhou, X.-h., and Wang, W.-x.: Influence of meteorological conditions and particulate matter on visual range impairment in Jinan, China, Sci. Total Environ., 383, 164-173, https://doi.org/10.1016/j.scitotenv.2007.04.042, 2007.
Yang, L., Zhou, X., Wang, Z., Zhou, Y., Cheng, S., Xu, P., Gao, X., Nie, W., Wang, X., and Wang, W.: Airborne fine particulate pollution in Jinan, China: Concentrations, chemical compositions and influence on visibility impairment, Atmos. Environ., 55, 506-514, https://doi.org/10.1016/j.atmosenv.2012.02.029, 2012.
Yao, X., Chan, C. K., Fang, M., Cadle, S., Chan, T., Mulawa, P., He, K., and Ye, B.: The water-soluble ionic composition of PM2.5 in Shanghai and Beijing, China, Atmos. Environ., 36, 4223-4234, https://doi.org/10.1016/S1352-2310(02)00342-4, 2002.
Yau, P. S., Lee, S. C., Cheng, Y., Huang, Y., Lai, S. C., and Xu, X. H.: Contribution of ship emissions to the fine particulate in the community near an international port in Hong Kong, Atmos. Res., 124, 61-72, https://doi.org/10.1016/j.atmosres.2012.12.009, 2013.
Ye, B., Ji, X., Yang, H., Yao, X., Chan, C. K., Cadle, S. H., Chan, T., and Mulawa, P. A.: Concentration and chemical composition of PM2.5 in Shanghai for a 1-year period, Atmos. Environ., 37, 499-510, https://doi.org/10.1016/S1352-2310(02)00918-4, 2003.
Ye, W.: Study on source apportionment of PM10 and PM2.5 in ambient air of Ningbo, Environ. Pollut. Control 33, 66-69, https://doi.org/10.15985/j.cnki.1001-3865.2011.09.019, 2011.
Yin, L., Niu, Z., Chen, X., Chen, J., Xu, L., and Zhang, F.: Chemical compositions of PM2.5 aerosol during haze periods in the mountainous city of Yong'an, China, J. Environ. Sci., 24, 1225-1233, https://doi.org/10.1016/S1001-0742(11)60940-6, 2012.
Zhang, B. and Zhang, W.: Source apportionment of PM2.5 in ambient air of Baotou, Environ. Eng., 32, 71-74+152, https://doi.org/10.13205/j.hjgc.201404017, 2014.
Zhang, F., Zhao, J., Chen, J., Xu, Y., and Xu, L.: Pollution characteristics of organic and elemental carbon in PM2.5 in Xiamen, China, J. Environ. Sci., 23, 1342-1349, https://doi.org/10.1016/S1001-0742(10)60559-1, 2011a.
Zhang, F., Xu, L., Chen, J., Yu, Y., Niu, Z., and Yin, L.: Chemical compositions and extinction coefficients of PM2.5 in peri-urban of Xiamen, China, during June 2009–May 2010, Atmos. Res., 106, 150-158, https://doi.org/10.1016/j.atmosres.2011.12.005, 2012.
Zhang, F., Cheng, H.-r., Wang, Z.-w., Lv, X.-p., Zhu, Z.-m., Zhang, G., and Wang, X.-m.: Fine particles (PM2.5) at a CAWNET background site in Central China: Chemical compositions, seasonal variations and regional pollution events, Atmos. Environ., 86, 193-202, https://doi.org/10.1016/j.atmosenv.2013.12.008, 2014a.
Zhang, F., Wang, Z.-w., Cheng, H.-r., Lv, X.-p., Gong, W., Wang, X.-m., and Zhang, G.: Seasonal variations and chemical characteristics of PM2.5 in Wuhan, central China, Sci. Total Environ., 518-519, 97-105, https://doi.org/10.1016/j.scitotenv.2015.02.054, 2015a.
Zhang, L., Huang, Y., Liu, Y., Yang, F., Lan, G., Fu, C., and Wang, J.: Characteristics of Carbonaceous Species in PM2.5 in Wanzhou in the Hinterland of the Three Gorges Reservior of Northeast Chongqing, China, https://doi.org/10.3390/atmos6040534, 2015b.
Zhang, N., Cao, J., Liu, S., Zhao, Z., Xu, H., and Xiao, S.: Chemical composition and sources of PM2.5 and TSP collected at Qinghai Lake during summertime, Atmos. Res., 138, 213-222, https://doi.org/10.1016/j.atmosres.2013.11.016, 2014b.
Zhang, N., Cao, J., Wang, Q., Huang, R., Zhu, C., Xiao, S., and Wang, L.: Biomass burning influences determination based on PM2.5 chemical composition combined with fire counts at southeastern Tibetan Plateau during pre-monsoon period, Atmos. Res., 206, 108-116, https://doi.org/10.1016/j.atmosres.2018.02.018, 2018.
Zhang, N., Zhuang, M., Tian, J., Tian, P., Zhang, J., Wang, Q., Zhou, Y. Q., Huang, R.-J., Zhu, C.-S., Zhang, X., and Cao, J.: Development of source profiles and their application in source apportionment of PM2.5 in Xiamen, China, Front. Environ. Sci. Eng., 10, 10.1007/s11783-016-0879-1, 2016.
Zhang, R., Jing, J., Tao, J., Hsu, S. C., Wang, G., Cao, J., Lee, C. S. L., Zhu, L., Chen, Z., Zhao, Y., and Shen, Z.: Chemical characterization and source apportionment of PM<sub>2.5</sub> in Beijing: seasonal perspective, Atmos. Chem. Phys., 13, 7053-7074, https://doi.org/10.5194/acp-13-7053-2013, 2013a.
Zhang, T., Cao, J., and Wu, F.: Characterization of gases and water soluble ion of PM2.5 during spring and summer of 2006 in Xi’an, J. Univ. China Acad. Sci., 24, 641-647, 2007.
Zhang, T., Cao, J. J., Tie, X. X., Shen, Z. X., Liu, S. X., Ding, H., Han, Y. M., Wang, G. H., Ho, K. F., Qiang, J., and Li, W. T.: Water-soluble ions in atmospheric aerosols measured in Xi'an, China: Seasonal variations and sources, Atmos. Res., 102, 110-119, https://doi.org/10.1016/j.atmosres.2011.06.014, 2011b.
Zhang, Y., Ren, L., Sun, J., Zhu, Z., and Chen, Y.: Features of Water-Soluble Components Pollution of Atmospheric Fine Particles in Nanjing, Environ. Monit. China, 29, 25-27, https://doi.org/10.19316/j.issn.1002-6002.2013.04.006, 2013b.
Zhang, Y., Zhang, H., Deng, J., Du, W., Hong, Y., Xu, L., Qiu, Y., Hong, Z., Wu, X., Ma, Q., Yao, J., and Chen, J.: Source regions and transport pathways of PM2.5 at a regional background site in East China, Atmos. Environ., 167, 202-211, https://doi.org/10.1016/j.atmosenv.2017.08.031, 2017.
Zhao, L., Wang, L., Tan, J., Duan, J., Ma, X., Zhang, C., Ji, S., Qi, M., Lu, X., Wang, Y., Wang, Q., and Xu, R.: Changes of chemical composition and source apportionment of PM2.5 during 2013–2017 in urban Handan, China, Atmos. Environ., 206, 119-131, https://doi.org/10.1016/j.atmosenv.2019.02.034, 2019.
Zhao, M., Qiao, T., Li, Y., Tang, X., Xiu, G., and Yu, J. Z.: Temporal variations and source apportionment of Hulis-C in PM2.5 in urban Shanghai, Sci. Total Environ., 571, 18-26, https://doi.org/10.1016/j.scitotenv.2016.07.127, 2016.
Zhao, M., Qiao, T., Huang, Z., Zhu, M., Xu, W., Xiu, G., Tao, J., and Lee, S.: Comparison of ionic and carbonaceous compositions of PM2.5 in 2009 and 2012 in Shanghai, China, Sci. Total Environ., 536, 695-703, https://doi.org/10.1016/j.scitotenv.2015.07.100, 2015.
Zhao, P. S., Dong, F., He, D., Zhao, X. J., Zhang, X. L., Zhang, W. Z., Yao, Q., and Liu, H. Y.: Characteristics of concentrations and chemical compositions for PM2.5 in the region of Beijing, Tianjin, and Hebei, China, Atmos. Chem. Phys., 13, 4631-4644, https://doi.org/10.5194/acp-13-4631-2013, 2013a.
Zhao, Y., Yu, R., Hu, G., Lin, X., and Liu, X.: Chemical characteristics and Pb isotopic compositions of PM2.5 in Nanchang, China, Particuology, 32, 95-102, https://doi.org/10.1016/j.partic.2016.07.009, 2017.
Zhao, Z., Cao, J., Shen, Z., Xu, B., Zhu, C., Chen, L. W. A., Su, X., Liu, S., Han, Y., Wang, G., and Ho, K.: Aerosol particles at a high-altitude site on the Southeast Tibetan Plateau, China: Implications for pollution transport from South Asia, J. Geophys. Res. Atmos., 118, 11,360-311,375, https://doi.org/10.1002/jgrd.50599, 2013b.
Zheng, J., Hu, M., Peng, J., Wu, Z., Kumar, P., Li, M., Wang, Y., and Guo, S.: Spatial distributions and chemical properties of PM2.5 based on 21 field campaigns at 17 sites in China, Chemosphere, 159, 480-487, https://doi.org/10.1016/j.chemosphere.2016.06.032, 2016.
Zhou, H., He, J., Zhao, B., Zhang, L., Fan, Q., Lü, C., Dudagula, Liu, T., and Yuan, Y.: The distribution of PM10 and PM2.5 carbonaceous aerosol in Baotou, China, Atmos. Res., 178-179, 102-113, https://doi.org/10.1016/j.atmosres.2016.03.019, 2016a.
Zhou, J., Xing, Z., Deng, J., and Du, K.: Characterizing and sourcing ambient PM2.5 over key emission regions in China I: Water-soluble ions and carbonaceous fractions, Atmos. Environ., 135, 20-30, https://doi.org/10.1016/j.atmosenv.2016.03.054, 2016b.
Zhou, J., Ho, S. S. H., Cao, J., Zhao, Z., Zhao, S., Zhu, C., Wang, Q., Liu, S., Zhang, T., Zhao, Y., Wang, P., and Tie, X.: Chemical characterization of PM2.5 from a southern coastal city of China: applications of modeling and chemical tracers in demonstration of regional transport, Environ. Sci. Pollut. Res., 25, 20591-20605, https://doi.org/10.1007/s11356-018-2238-1, 2018a.
Zhou, M., Zhang, Y., Han, Y., Wu, J., Du, X., Xu, H., Feng, Y., and Han, S.: Spatial and temporal characteristics of PM2.5 acidity during autumn in marine and coastal area of Bohai Sea, China, based on two-site contrast, Atmos. Res., 202, 196-204, https://doi.org/10.1016/j.atmosres.2017.11.014, 2018b.
Zhu, Y., Yang, L., Meng, C., Yuan, Q., Yan, C., Dong, C., Sui, X., Yao, L., Yang, F., Lu, Y., and Wang, W.: Indoor/outdoor relationships and diurnal/nocturnal variations in water-soluble ion and PAH concentrations in the atmospheric PM2.5 of a business office area in Jinan, a heavily polluted city in China, Atmos. Res., 153, 276-285, https://doi.org/10.1016/j.atmosres.2014.08.014, 2015.
Zong, Z., Wang, X., Tian, C., Chen, Y., Fu, S., Qu, L., Ji, L., Li, J., and Zhang, G.: PMF and PSCF based source apportionment of PM2.5 at a regional background site in North China, Atmos. Res., 203, 207-215, https://doi.org/10.1016/j.atmosres.2017.12.013, 2018.
Zou, B.-B., Huang, X.-F., Zhang, B., Dai, J., Zeng, L.-W., Feng, N., and He, L.-Y.: Source apportionment of PM2.5 pollution in an industrial city in southern China, Atmos. Pollut. Res, 8, 1193-1202, https://doi.org/10.1016/j.apr.2017.05.001, 2017.
