# Supplementary material for: Evaluation of CMIP6 model simulations of PM 2.5 and its components over China
Source: Copernicus journal article supplement (doi:10.5194/gmd-17-4821-2024), 2024-06-20
Supplement: Supplementary file 2 [file gmd-17-4821-2024-supplement.zip]

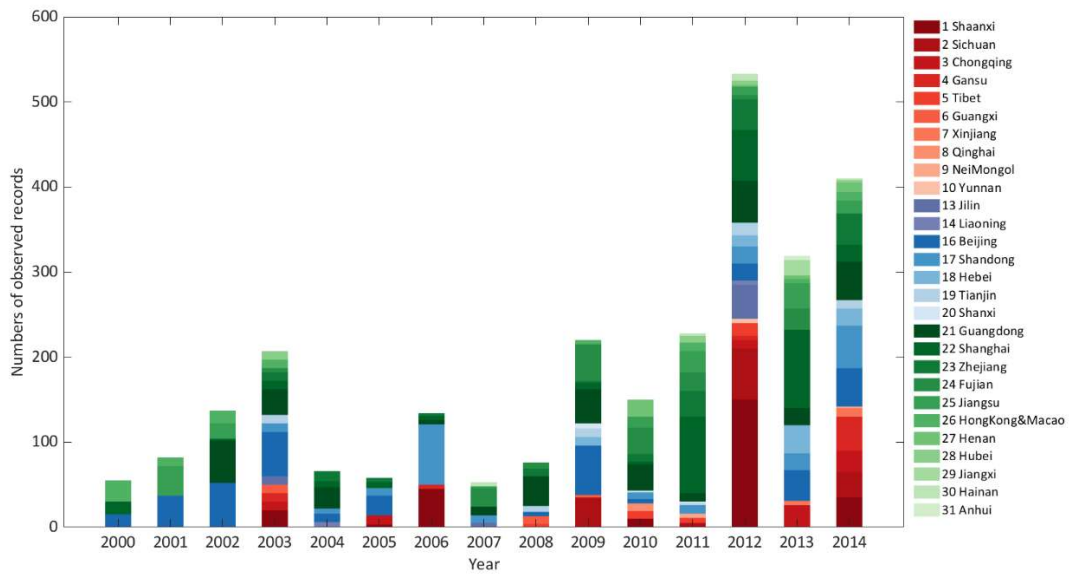

1

2 **Figure S1.** Provincial observed records over China during 2000–2014. The color and labeling of provinces are

3 consistent with Figure 1.

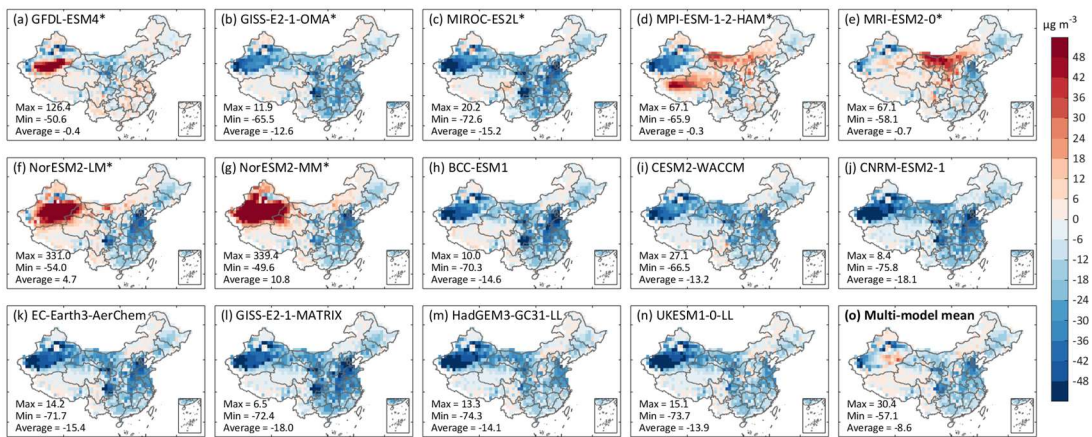

4

5 **Figure S2.** Spatial distribution of bias in the multi-year average of simulate-based  $PM_{2.5}$  concentrations during 2000–

6 2014 for each model.

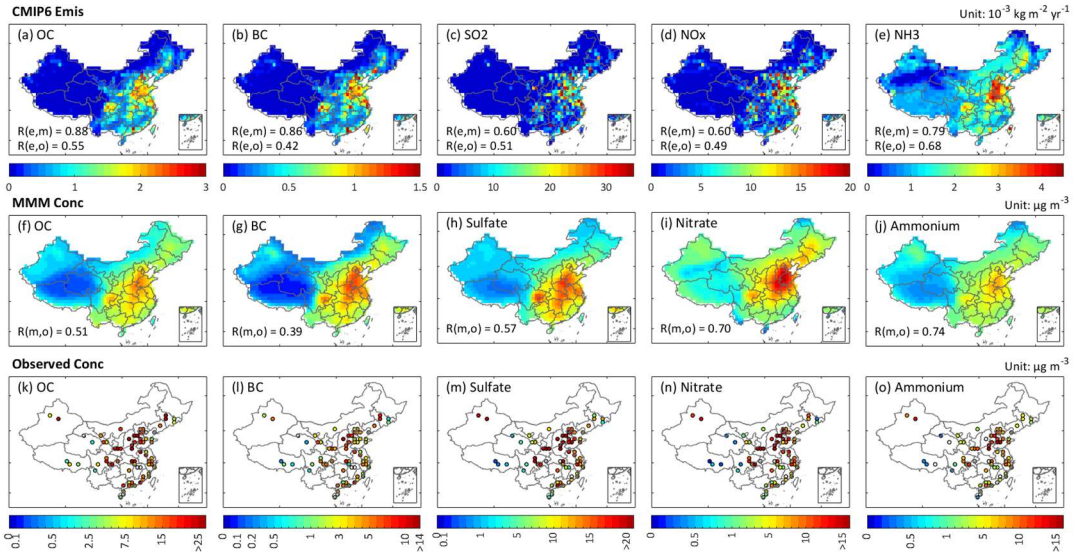

7  
8 **Figure S3.** Multi-year average of CMIP6 emissions (a-e), multi-model mean concentrations (f-j), and observed  
9 concentrations (k-o) of air pollutants over 2000–2014.  $R(e, m)$ ,  $R(e, o)$ , and  $R(m, o)$  denote the spatial correlation  
10 coefficients between CMIP6 emissions and multi-model mean concentrations, between CMIP6 emissions and  
11 observed concentrations, and between multi-model mean concentrations and observed concentrations.

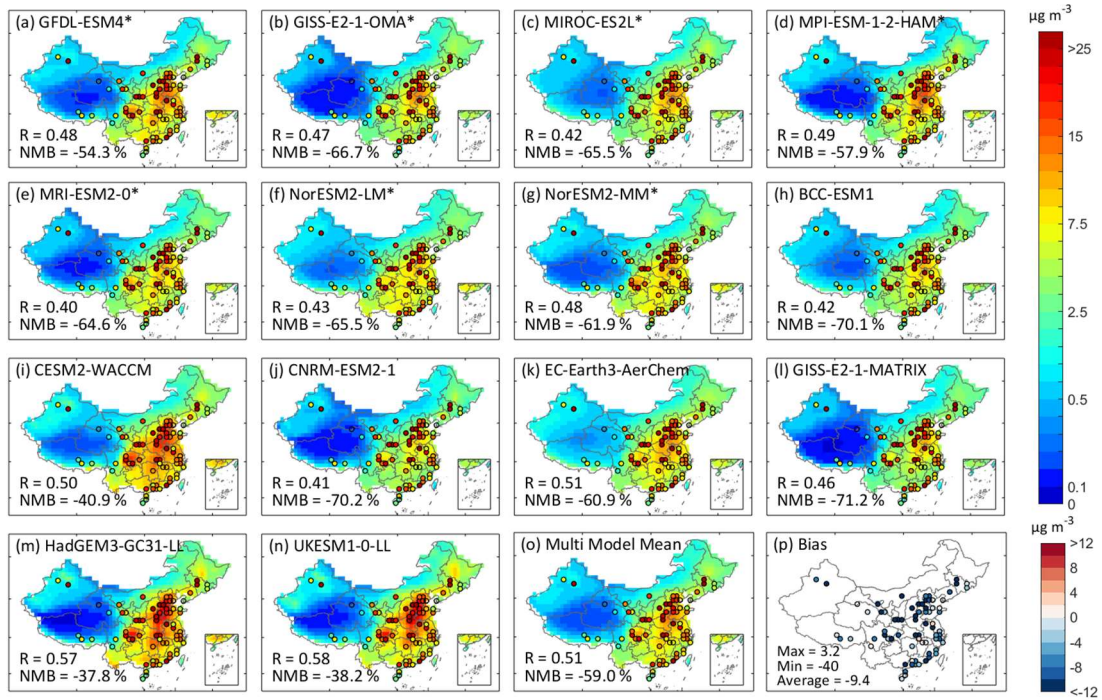

12  
13 **Figure S4.** Multi-year mean annual average near-surface OC concentrations over China during 2000–2014. (a-n)  
14 OC in individual models overlaid with ground-based observations. (o) Multi-model mean overlaid with ground-  
15 based observations. (p) Bias in multi-model mean.



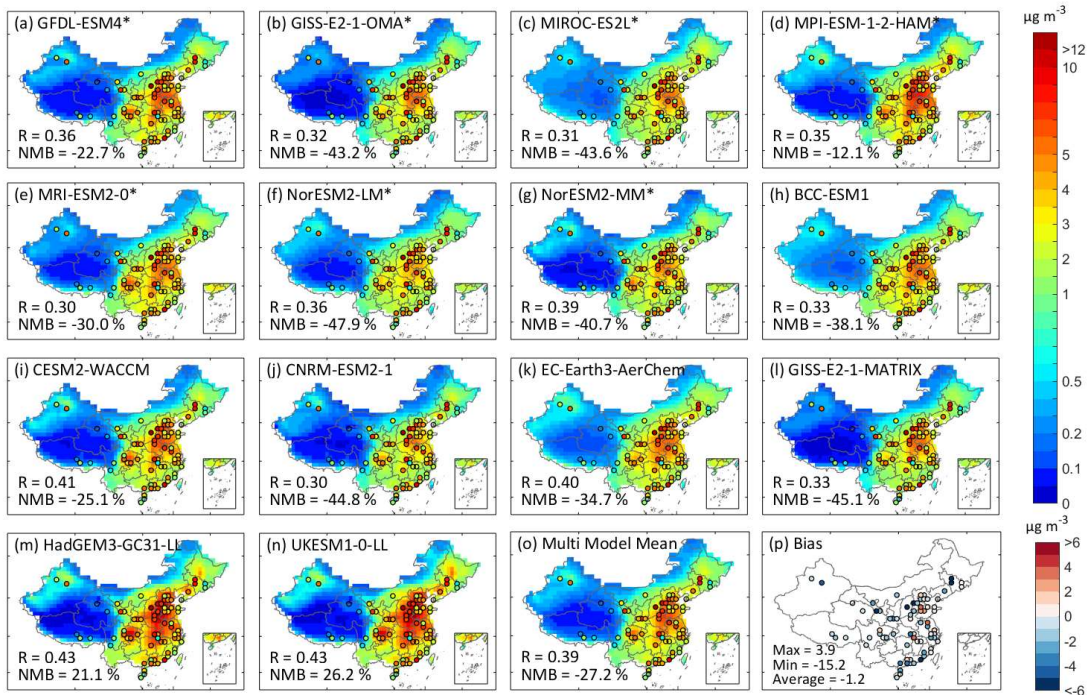

16

17 **Figure S5.** Multi-year mean annual average near-surface BC concentrations over China during 2000–2014. (a-n)

18 BC in individual models overlaid with ground-based observations. (o) Multi-model mean overlaid with ground-

19 based observations. (p) Bias in multi-model mean.

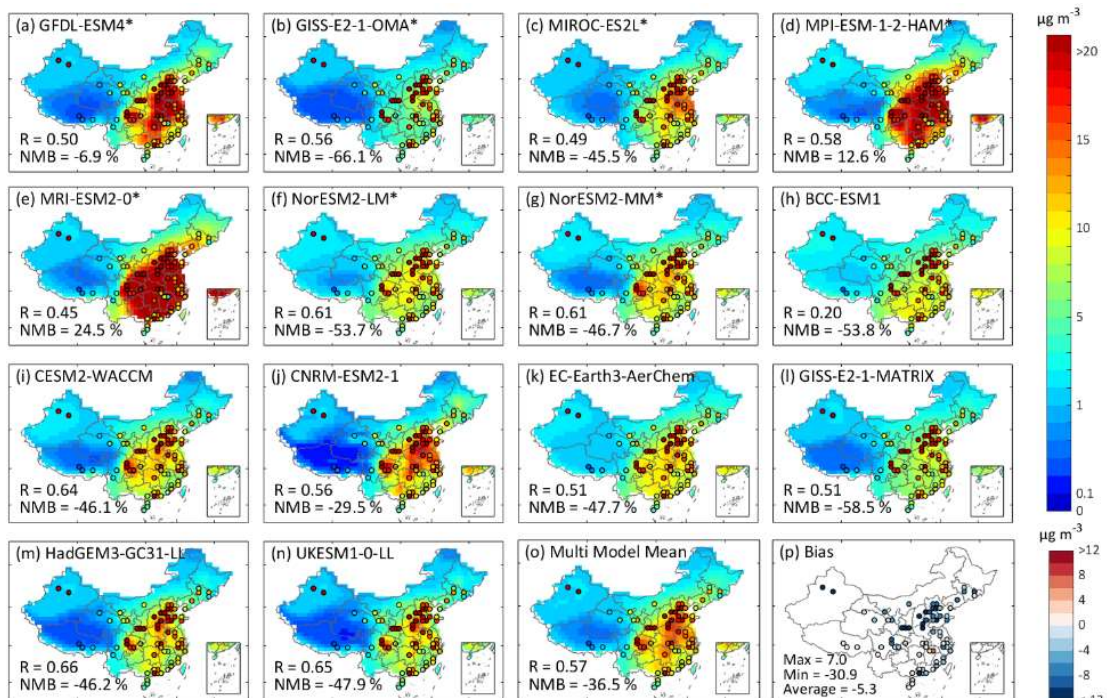

20

21 **Figure S6.** Multi-year mean annual average near-surface sulfate concentrations over China during 2000–2014. (a-n)

22 Sulfate in individual models overlaid with ground-based observations. (o) Multi-model mean overlaid with ground-

23 based observations. (p) Bias in multi-model mean.

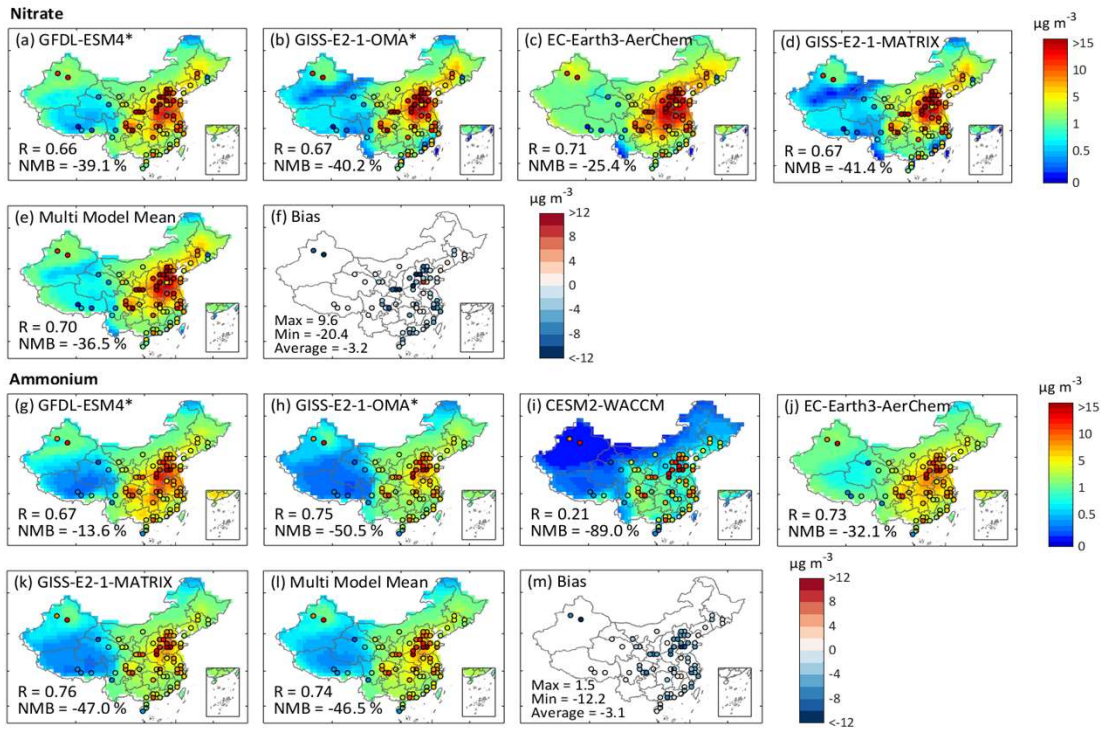

24

25 **Figure S7.** Multi-year mean annual average near-surface nitrate and ammonium concentrations over China during

26 2000–2014. (a-d) Nitrate and (g-k) ammonium in individual models overlaid with ground-based observations. (e, l)

27 Multi-model mean of overlaid with ground-based observations. (f, m) Bias in multi-model mean.

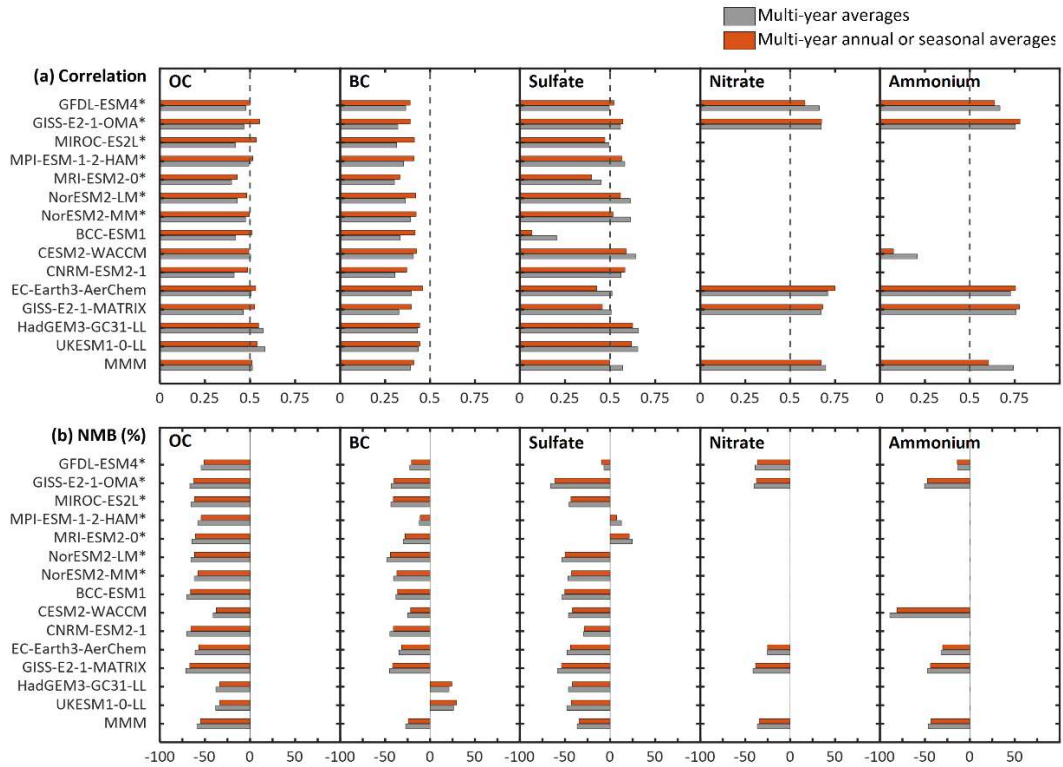

28

29 **Figure S8.** Spatial correlation and bias of multi-year averages (gray bar) and multi-year annual or seasonal averages

30 (red bar) of PM<sub>2.5</sub> components during 2000–2014 for individual models.

31 **Table S1.** CMIP6 models and PM<sub>2.5</sub> outputs.

| Model                 | Resolution<br>(Lat × Lon) | Number of<br>members | OA, BC,<br>SO <sub>4</sub> <sup>2-</sup> ,<br>SSLT, DST | NO <sub>3</sub> <sup>-</sup> ,<br>NH <sub>4</sub> <sup>+</sup> | PM <sub>2.5</sub> | Model references and data<br>citation                                                           |
|-----------------------|---------------------------|----------------------|---------------------------------------------------------|----------------------------------------------------------------|-------------------|-------------------------------------------------------------------------------------------------|
| BCC-ESM1              | 2.813° ×<br>2.813°        | 3                    | Y                                                       |                                                                |                   | (Wu et al., 2019; Wu et al., 2020;<br>Zhang et al., 2018)                                       |
| CESM2-<br>WACCM       | 0.9° × 1.25°              | 3                    | Y                                                       | Y (No<br>NO <sub>3</sub> <sup>-</sup> )                        |                   | (Danabasoglu, 2019; Gettelman et<br>al., 2019; Tilmes et al., 2019;<br>Emmons et al., 2020)     |
| CNRM-<br>ESM2-1       | 1.4° × 1.4°               | 3                    | Y                                                       |                                                                |                   | (Séférian, 2018; Séférian et al.,<br>2019; Michou et al., 2020)                                 |
| EC-Earth3-<br>AerChem | 2° × 3°                   | 3                    | Y                                                       | Y                                                              |                   | (Van Noije et al., 2021; Döscher<br>et al., 2022; EC-Earth Ec-Earth-<br>Consortium, 2020)       |
| GFDL-<br>ESM4         | 1° × 1.25°                | 1                    | Y                                                       | Y                                                              | Y                 | (Horowitz et al., 2020; Dunne et<br>al., 2020; Krasting et al., 2018)                           |
| GISS-E2-1-<br>OMA     | 2° × 2.5°                 | 15                   | Y                                                       | Y                                                              | Y                 | (Bauer et al., 2020; Miller et al.,<br>2021; Nasa Goddard Institute for<br>Space Studies, 2018) |
| GISS-E2-1-<br>MATRIX  | 2° × 2.5°                 | 12                   | Y                                                       | Y                                                              |                   | (Bauer et al., 2020; Miller et al.,<br>2021; Nasa Goddard Institute for<br>Space Studies, 2018) |
| HadGEM3-<br>GC31-LL   | 1.25° ×<br>1.875°         | 4                    | Y                                                       |                                                                |                   | (Ridley et al., 2018; Kuhlbrodt et<br>al., 2018)                                                |
| MIROC-<br>ES2L        | 2.813° ×<br>2.813°        | 10                   | Y                                                       |                                                                | Y                 | (Hajima et al., 2020; Hajima et<br>al., 2019)                                                   |
| MPI-ESM-<br>1-2-HAM   | 1.875° ×<br>1.875°        | 3                    | Y                                                       |                                                                | Y                 | (Tegen et al., 2019; Neubauer et<br>al., 2019)                                                  |
| MRI-ESM2-<br>0        | 1.875° ×<br>1.875°        | 5                    | Y                                                       |                                                                | Y                 | (Yukimoto et al., 2019a;<br>Yukimoto et al., 2019b; Oshima<br>et al., 2020)                     |

|             |                |   |   |   |                                                                                         |
|-------------|----------------|---|---|---|-----------------------------------------------------------------------------------------|
| NorESM2-LM  | 1.9° × 2.5°    | 3 | Y | Y | (Karset et al., 2018; Seland et al., 2019; Seland et al., 2020; Kirkevåg et al., 2018)  |
| NorESM2-MM  | 0.9° × 1.25°   | 3 | Y | Y | (Karset et al., 2018; Bentsen et al., 2019; Seland et al., 2020; Kirkevåg et al., 2018) |
| UKESM1-0-LL | 1.25° × 1.875° | 4 | Y |   | (Tang et al., 2019; Sellar et al., 2019)                                                |

32 **Table S2.** The specific values of  $a_1$  and  $a_2$  from Eq. 1. The average, trend, and spatial correlation coefficients of  
33 PM<sub>2.5</sub> concentrations over the eastern region and western region during 2000–2014.

|                                                      | Model             | $a_1$ | $a_2$ | Eastern region                   |                                                             |                            | Western region                   |                                                |               |
|------------------------------------------------------|-------------------|-------|-------|----------------------------------|-------------------------------------------------------------|----------------------------|----------------------------------|------------------------------------------------|---------------|
|                                                      |                   |       |       | Average ( $\mu\text{g m}^{-3}$ ) | Trend ( $\mu\text{g m}^{-3} \text{ yr}^{-1}$ ) <sup>a</sup> | Spatial Corr. <sup>b</sup> | Average ( $\mu\text{g m}^{-3}$ ) | Trend ( $\mu\text{g m}^{-3} \text{ yr}^{-1}$ ) | Spatial Corr. |
| <b>Satellite-based</b>                               |                   |       |       | 39.0                             | 0.72                                                        | 1                          | 22.7                             | 0.06*                                          | 1             |
| <b>Total PM<sub>2.5</sub> from Direct ESM output</b> | GFDL-ESM4         |       |       | 37.7                             | 1.14                                                        | 0.92                       | 22.1                             | 0.28                                           | 0.66          |
|                                                      | GISS-E2-1-OMA     |       |       | 24.4                             | 0.69                                                        | 0.91                       | 10.9                             | 0.13                                           | 0.79          |
|                                                      | MIROC-ES2L        |       |       | 20.3                             | 0.49                                                        | 0.90                       | 8.9                              | 0.13                                           | 0.59          |
|                                                      | MPI-ESM1-2-HAM    |       |       | 36.6                             | 0.93                                                        | 0.91                       | 22.5                             | 0.20*                                          | 0.36          |
|                                                      | MRI-ESM2-0        |       |       | 30.4                             | 0.57                                                        | 0.83                       | 24.5                             | 0.24                                           | 0.71          |
|                                                      | NorESM2-LM        |       |       | 22.1                             | 0.32                                                        | 0.87                       | 35.5                             | 0.03*                                          | 0.49          |
|                                                      | NorESM2-MM        |       |       | 23.6                             | 0.40                                                        | 0.90                       | 43.1                             | -0.10*                                         | 0.53          |
| <b>Total PM<sub>2.5</sub> from Eq. 1</b>             | BCC-ESM1          |       |       | 19.5                             | 0.40                                                        | 0.87                       | 10.2                             | 0.15                                           | 0.62          |
|                                                      | CESM2-WACCM       | 0.25  | 0.1   | 24.0                             | 0.73                                                        | 0.92                       | 10.1                             | 0.22                                           | 0.67          |
|                                                      | CNRM-ESM2-1       | 0.02  | 0.25  | 18.9                             | 0.42                                                        | 0.90                       | 5.5                              | 0.11                                           | 0.51          |
|                                                      | EC-Earth3-AerChem | 0.25  | 0.1   | 21.4                             | 0.56                                                        | 0.91                       | 8.3                              | 0.18                                           | 0.53          |

|                  |      |      |      |      |      |     |      |      |
|------------------|------|------|------|------|------|-----|------|------|
| GISS-E2-1-MATRIX | 0.25 | 0.1  | 17.0 | 0.43 | 0.92 | 6.4 | 0.10 | 0.67 |
| HadGEM3-GC31-LL  | 0.27 | 0.35 | 26.5 | 0.80 | 0.89 | 7.9 | 0.18 | 0.50 |
| UKESM1-0-LL      | 0.27 | 0.35 | 26.5 | 0.71 | 0.89 | 8.1 | 0.18 | 0.52 |

34 <sup>a</sup> Trends are estimated using the Theil-Sen Median method (Theil, 1950; Sen, 1968). Significant changes are  
35 identified using the non-parametric Mann-Kendall test (Kendall, 1938). \* represents non-significant monotonous  
36 change at  $p = 0.05$ . <sup>b</sup> Spatial correlation coefficients between simulations and satellite-based data over the eastern  
37 and western regions are calculated. The spatial correlation coefficients of 14 models are at the 0.05 significance level.

38 **Table S3.** Multi-year averages of PM<sub>2.5</sub> concentrations including five aerosol species (Eq. 1) and all fine aerosol  
39 species from 4 models providing nitrate and ammonium simulations.

| Model             | PM <sub>2.5</sub> according to Eq. 1 ( $\mu\text{g m}^{-3}$ ) | PM <sub>2.5</sub> including all fine aerosol species ( $\mu\text{g m}^{-3}$ ) <sup>a</sup> | Nitrate proportion <sup>b</sup> | Ammonium proportion |
|-------------------|---------------------------------------------------------------|--------------------------------------------------------------------------------------------|---------------------------------|---------------------|
| EC-Earth3-AerChem | 12.1                                                          | 18.7                                                                                       | 20.6%                           | 14.3%               |
| GFDL-ESM4         | 13.0                                                          | 18.5                                                                                       | 15.1%                           | 14.6%               |
| GISS-E2-1-OMA     | 10.0                                                          | 14.1                                                                                       | 17.6%                           | 11.4%               |
| GISS-E2-1-MATRIX  | 9.5                                                           | 13.8                                                                                       | 17.5%                           | 13.2%               |

40 <sup>a</sup> represents that  $\text{PM}_{2.5} = \text{OA} + \text{BC} + \text{SO}_4^{2-} + 0.25\text{SSLT} + 0.1\text{DST} + \text{NO}_3^- + \text{NH}_4^+$ . <sup>b</sup> represents that the proportion  
41 of nitrate to PM<sub>2.5</sub> including all fine aerosol species.

## 42 Reference

43 Bauer, S. E., Tsigaridis, K., Faluvegi, G., Kelley, M., Lo, K. K., Miller, R. L., Nazarenko, L., Schmidt,  
44 G. A., and Wu, J.: Historical (1850–2014) Aerosol Evolution and Role on Climate Forcing Using the  
45 GISS ModelE2.1 Contribution to CMIP6, *J. Adv. Model. Earth Syst.*, 12, e2019MS001978,  
46 <https://doi.org/10.1029/2019MS001978>, 2020.

47 Bentsen, M., Olivière, D. J. L., Seland, Ø., Toniazzo, T., Gjermundsen, A., Graff, L. S., Debernard, J. B.,  
48 Gupta, A. K., He, Y., Kirkevåg, A., Schwinger, J., Tjiputra, J., Aas, K. S., Bethke, I., Fan, Y., Griesfeller,  
49 J., Grini, A., Guo, C., Ilicak, M., Karset, I. H. H., Landgren, O. A., Liakka, J., Moseid, K. O., Nummelin,  
50 A., Spensberger, C., Tang, H., Zhang, Z., Heinze, C., Iversen, T., and Schulz, M.: NCC NorESM2-MM  
51 model output prepared for CMIP6 CMIP (v20201001), Earth System Grid Federation [dataset],  
52 <https://doi.org/10.22033/ESGF/CMIP6.506>, 2019.

53 Danabasoglu, G.: NCAR CESM2-WACCM model output prepared for CMIP6 CMIP (v20190415),  
54 Earth System Grid Federation [dataset], <https://doi.org/10.22033/ESGF/CMIP6.10024>, 2019.



55 Döscher, R., Acosta, M., Alessandri, A., Anthoni, P., Arsouze, T., Bergman, T., Bernardello, R., Boussetta,  
56 S., Caron, L. P., Carver, G., Castrillo, M., Catalano, F., Cvijanovic, I., Davini, P., Dekker, E., Doblas-  
57 Reyes, F. J., Docquier, D., Echevarria, P., Fladrich, U., Fuentes-Franco, R., Gröger, M., v. Hardenberg,  
58 J., Hieronymus, J., Karami, M. P., Keskinen, J. P., Koenigk, T., Makkonen, R., Massonnet, F., Ménégoz,  
59 M., Miller, P. A., Moreno-Chamarro, E., Nieradzick, L., van Noije, T., Nolan, P., O'Donnell, D., Ollinaho,  
60 P., van den Oord, G., Ortega, P., Prims, O. T., Ramos, A., Reerink, T., Rousset, C., Ruprich-Robert, Y.,  
61 Le Sager, P., Schmith, T., Schrödner, R., Serva, F., Sicardi, V., Sloth Madsen, M., Smith, B., Tian, T.,  
62 Tourigny, E., Uotila, P., Vancoppenolle, M., Wang, S., Wårlind, D., Willén, U., Wyser, K., Yang, S.,  
63 Yepes-Arbós, X., and Zhang, Q.: The EC-Earth3 Earth system model for the Coupled Model  
64 Intercomparison Project 6, *Geosci. Model Dev.*, 15, 2973-3020, [https://doi.org/10.5194/gmd-15-2973-](https://doi.org/10.5194/gmd-15-2973-2022)  
65 [2022](https://doi.org/10.5194/gmd-15-2973-2022), 2022.

66 Dunne, J. P., Horowitz, L. W., Adcroft, A. J., Ginoux, P., Held, I. M., John, J. G., Krasting, J. P., Malyshev,  
67 S., Naik, V., Paulot, F., Shevliakova, E., Stock, C. A., Zadeh, N., Balaji, V., Blanton, C., Dunne, K. A.,  
68 Dupuis, C., Durachta, J., Dussin, R., Gauthier, P. P. G., Griffies, S. M., Guo, H., Hallberg, R. W., Harrison,  
69 M., He, J., Hurlin, W., McHugh, C., Menzel, R., Milly, P. C. D., Nikonov, S., Paynter, D. J., Ploshay, J.,  
70 Radhakrishnan, A., Rand, K., Reichl, B. G., Robinson, T., Schwarzkopf, D. M., Sentman, L. T.,  
71 Underwood, S., Vahlenkamp, H., Winton, M., Wittenberg, A. T., Wyman, B., Zeng, Y., and Zhao, M.:  
72 The GFDL Earth System Model Version 4.1 (GFDL-ESM 4.1): Overall Coupled Model Description and  
73 Simulation Characteristics, *J. Adv. Model. Earth Syst.*, 12, e2019MS002015,  
74 <https://doi.org/10.1029/2019MS002015>, 2020.

75 EC-Earth-Consortium: EC-Earth3-AerChem model output prepared for CMIP6 CMIP (v20201214),  
76 Earth System Grid Federation [dataset], <https://doi.org/10.22033/ESGF/CMIP6.639>, 2020.

77 Emmons, L. K., Schwantes, R. H., Orlando, J. J., Tyndall, G., Kinnison, D., Lamarque, J.-F., Marsh, D.,  
78 Mills, M. J., Tilmes, S., Bardeen, C., Buchholz, R. R., Conley, A., Gettelman, A., Garcia, R., Simpson,  
79 I., Blake, D. R., Meinardi, S., and Pétron, G.: The Chemistry Mechanism in the Community Earth System  
80 Model Version 2 (CESM2), *J. Adv. Model. Earth Syst.*, 12, e2019MS001882,  
81 <https://doi.org/10.1029/2019MS001882>, 2020.

82 Gettelman, A., Mills, M. J., Kinnison, D. E., Garcia, R. R., Smith, A. K., Marsh, D. R., Tilmes, S., Vitt,  
83 F., Bardeen, C. G., McNerny, J., Liu, H.-L., Solomon, S. C., Polvani, L. M., Emmons, L. K., Lamarque,  
84 J.-F., Richter, J. H., Glanville, A. S., Bacmeister, J. T., Phillips, A. S., Neale, R. B., Simpson, I. R.,  
85 DuVivier, A. K., Hodzic, A., and Randel, W. J.: The Whole Atmosphere Community Climate Model  
86 Version 6 (WACCM6), *J. Geophys. Res.-Atmos.*, 124, 12380-12403,  
87 <https://doi.org/10.1029/2019JD030943>, 2019.

88 Hajima, T., Watanabe, M., Yamamoto, A., Tatebe, H., Noguchi, M. A., Abe, M., Ohgaito, R., Ito, A.,  
89 Yamazaki, D., Okajima, H., Ito, A., Takata, K., Ogochi, K., Watanabe, S., and Kawamiya, M.:  
90 Development of the MIROC-ES2L Earth system model and the evaluation of biogeochemical processes  
91 and feedbacks, *Geosci. Model Dev.*, 13, 2197-2244, <https://doi.org/10.5194/gmd-13-2197-2020>, 2020.

92 Hajima, T., Abe, M., Arakawa, O., Suzuki, T., Komuro, Y., Ogura, T., Ogochi, K., Watanabe, M.,  
93 Yamamoto, A., Tatebe, H., Noguchi, M. A., Ohgaito, R., Ito, A., Yamazaki, D., Ito, A., Takata, K.,  
94 Watanabe, S., Kawamiya, M., and Tachiiri, K.: MIROC MIROC-ES2L model output prepared for CMIP6



95 CMIP (v20190823), Earth System Grid Federation [dataset], <https://doi.org/10.22033/ESGF/CMIP6.902>,  
96 2019.

97 Horowitz, L. W., Naik, V., Paulot, F., Ginoux, P. A., Dunne, J. P., Mao, J., Schnell, J., Chen, X., He, J.,  
98 John, J. G., Lin, M., Lin, P., Malyshev, S., Paynter, D., Shevliakova, E., and Zhao, M.: The GFDL Global  
99 Atmospheric Chemistry-Climate Model AM4.1: Model Description and Simulation Characteristics, *J.*  
100 *Adv. Model. Earth Syst.*, 12, e2019MS002032, <https://doi.org/10.1029/2019MS002032>, 2020.

101 Karset, I. H. H., Berntsen, T. K., Storelvmo, T., Alterskjær, K., Grini, A., Olivié, D., Kirkevåg, A., Seland,  
102 Ø., Iversen, T., and Schulz, M.: Strong impacts on aerosol indirect effects from historical oxidant changes,  
103 *Atmos. Chem. Phys.*, 18, 7669-7690, <https://doi.org/10.5194/acp-18-7669-2018>, 2018.

104 Kendall, M. G.: A new measure of rank correlation, *Biometrika*, 30, 81-93,  
105 <https://doi.org/10.1093/biomet/30.1-2.81>, 1938.

106 Kirkevåg, A., Grini, A., Olivié, D., Seland, Ø., Alterskjær, K., Hummel, M., Karset, I. H. H., Lewinschal,  
107 A., Liu, X., Makkonen, R., Bethke, I., Griesfeller, J., Schulz, M., and Iversen, T.: A production-tagged  
108 aerosol module for Earth system models, OsloAero5.3 – extensions and updates for CAM5.3-Oslo,  
109 *Geosci. Model Dev.*, 11, 3945-3982, <https://doi.org/10.5194/gmd-11-3945-2018>, 2018.

110 Krasting, J. P., John, J. G., Blanton, C., McHugh, C., Nikonov, S., Radhakrishnan, A., Rand, K., Zadeh,  
111 N. T., Balaji, V., Durachta, J., Dupuis, C., Menzel, R., Robinson, T., Underwood, S., Vahlenkamp, H.,  
112 Dunne, K. A., Gauthier, P. P. G., Ginoux, P., Griffies, S. M., Hallberg, R., Harrison, M., Hurlin, W.,  
113 Malyshev, S., Naik, V., Paulot, F., Paynter, D. J., Ploshay, J., Reichl, B. G., Schwarzkopf, D. M., Seman,  
114 C. J., Silvers, L., Wyman, B., Zeng, Y., Adcroft, A., Dunne, J. P., Dussin, R., Guo, H., He, J., Held, I. M.,  
115 Horowitz, L. W., Lin, P., Milly, P. C. D., Shevliakova, E., Stock, C., Winton, M., Wittenberg, A. T., Xie,  
116 Y., and Zhao, M.: NOAA-GFDL GFDL-ESM4 model output prepared for CMIP6 CMIP (v20190726),  
117 Earth System Grid Federation [dataset], <https://doi.org/10.22033/ESGF/CMIP6.1407>, 2018.

118 Kuhlbrodt, T., Jones, C. G., Sellar, A., Storkey, D., Blockley, E., Stringer, M., Hill, R., Graham, T., Ridley,  
119 J., Blaker, A., Calvert, D., Copsey, D., Ellis, R., Hewitt, H., Hyder, P., Ineson, S., Mulcahy, J., Siahann,  
120 A., and Walton, J.: The Low-Resolution Version of HadGEM3 GC3.1: Development and Evaluation for  
121 Global Climate, *J. Adv. Model. Earth Syst.*, 10, 2865-2888, <https://doi.org/10.1029/2018MS001370>,  
122 2018.

123 Michou, M., Nabat, P., Saint-Martin, D., Bock, J., Decharme, B., Mallet, M., Roehrig, R., Séférian, R.,  
124 Sénési, S., and Voldoire, A.: Present-Day and Historical Aerosol and Ozone Characteristics in CNRM  
125 CMIP6 Simulations, *J. Adv. Model. Earth Syst.*, 12, e2019MS001816,  
126 <https://doi.org/10.1029/2019MS001816>, 2020.

127 Miller, R. L., Schmidt, G. A., Nazarenko, L. S., Bauer, S. E., Kelley, M., Ruedy, R., Russell, G. L.,  
128 Ackerman, A. S., Aleinov, I., Bauer, M., Bleck, R., Canuto, V., Cesana, G., Cheng, Y., Clune, T. L., Cook,  
129 B. I., Cruz, C. A., Del Genio, A. D., Elsaesser, G. S., Faluvegi, G., Kiang, N. Y., Kim, D., Lacis, A. A.,  
130 Leboissetier, A., LeGrande, A. N., Lo, K. K., Marshall, J., Matthews, E. E., McDermid, S., Mezuman,  
131 K., Murray, L. T., Oinas, V., Orbe, C., Pérez García-Pando, C., Perlwitz, J. P., Puma, M. J., Rind, D.,  
132 Romanou, A., Shindell, D. T., Sun, S., Tausnev, N., Tsigaridis, K., Tselioudis, G., Weng, E., Wu, J., and

133 Yao, M.-S.: CMIP6 Historical Simulations (1850–2014) With GISS-E2.1, *J. Adv. Model. Earth Syst.*, 13,  
134 e2019MS002034, <https://doi.org/10.1029/2019MS002034>, 2021.

135 Nasa Goddard Institute for Space Studies: NASA-GISS GISS-E2.1G model output prepared for CMIP6  
136 CMIP (v20190702), Earth System Grid Federation [dataset],  
137 <https://doi.org/10.22033/ESGF/CMIP6.1400>, 2018.

138 Neubauer, D., Ferrachat, S., Siegenthaler-Le Drian, C., Stoll, J., Folini, D. S., Tegen, I., Wieners, K.-H.,  
139 Mauritsen, T., Stemmler, I., Barthel, S., Bey, I., Daskalakis, N., Heinold, B., Kokkola, H., Partridge, D.,  
140 Rast, S., Schmidt, H., Schutgens, N., Stanelle, T., Stier, P., Watson-Parris, D., and Lohmann, U.:  
141 HAMMOZ-Consortium MPI-ESM1.2-HAM model output prepared for CMIP6 CMIP (v20190627),  
142 Earth System Grid Federation [dataset], <https://doi.org/10.22033/ESGF/CMIP6.1622>, 2019.

143 Oshima, N., Yukimoto, S., Deushi, M., Koshiro, T., Kawai, H., Tanaka, T., and Yoshida, K.: Global and  
144 Arctic effective radiative forcing of anthropogenic gases and aerosols in MRI-ESM2.0, *Prog. Earth  
145 Planet. Sci.*, 7, <https://doi.org/10.1186/s40645-020-00348-w>, 2020.

146 Ridley, J., Menary, M., Kuhlbrodt, T., Andrews, M., and Andrews, T.: MOHC HadGEM3-GC31-LL  
147 model output prepared for CMIP6 CMIP (v20190624), Earth System Grid Federation [dataset],  
148 <https://doi.org/10.22033/ESGF/CMIP6.419>, 2018.

149 Séférian, R.: CNRM-CERFACS CNRM-ESM2-1 model output prepared for CMIP6 CMIP (v20181206),  
150 Earth System Grid Federation [dataset], <https://doi.org/10.22033/ESGF/CMIP6.1391>, 2018.

151 Séférian, R., Nabat, P., Michou, M., Saint-Martin, D., Voldoire, A., Colin, J., Decharme, B., Delire, C.,  
152 Berthet, S., Chevallier, M., Sénési, S., Franchisteguy, L., Vial, J., Mallet, M., Joetjzer, E., Geoffroy, O.,  
153 Guérémy, J.-F., Moine, M.-P., Msadek, R., Ribes, A., Rocher, M., Roehrig, R., Salas-y-Mélie, D.,  
154 Sanchez, E., Terray, L., Valcke, S., Waldman, R., Aumont, O., Bopp, L., Deshayes, J., Éthé, C., and  
155 Madec, G.: Evaluation of CNRM Earth System Model, CNRM-ESM2-1: Role of Earth System Processes  
156 in Present-Day and Future Climate, *J. Adv. Model. Earth Syst.*, 11, 4182-4227,  
157 <https://doi.org/10.1029/2019MS001791>, 2019.

158 Seland, Ø., Bentsen, M., Olivie, D., Toniazzo, T., Gjermundsen, A., Graff, L. S., Debernard, J. B., Gupta,  
159 A. K., He, Y. C., Kirkevåg, A., Schwinger, J., Tjiputra, J., Aas, K. S., Bethke, I., Fan, Y., Griesfeller, J.,  
160 Grini, A., Guo, C., Ilicak, M., Karset, I. H. H., Landgren, O., Liakka, J., Moseid, K. O., Nummelin, A.,  
161 Spensberger, C., Tang, H., Zhang, Z., Heinze, C., Iversen, T., and Schulz, M.: Overview of the Norwegian  
162 Earth System Model (NorESM2) and key climate response of CMIP6 DECK, historical, and scenario  
163 simulations, *Geosci. Model Dev.*, 13, 6165-6200, <https://doi.org/10.5194/gmd-13-6165-2020>, 2020.

164 Seland, Ø., Bentsen, M., Olivie, D. J. L., Toniazzo, T., Gjermundsen, A., Graff, L. S., Debernard, J. B.,  
165 Gupta, A. K., He, Y., Kirkevåg, A., Schwinger, J., Tjiputra, J., Aas, K. S., Bethke, I., Fan, Y., Griesfeller,  
166 J., Grini, A., Guo, C., Ilicak, M., Karset, I. H. H., Landgren, O. A., Liakka, J., Moseid, K. O., Nummelin,  
167 A., Spensberger, C., Tang, H., Zhang, Z., Heinze, C., Iversen, T., and Schulz, M.: NCC NorESM2-LM  
168 model output prepared for CMIP6 CMIP (v20190815), Earth System Grid Federation [dataset],  
169 <https://doi.org/10.22033/ESGF/CMIP6.502>, 2019.

170 Sellar, A. A., Jones, C. G., Mulcahy, J. P., Tang, Y., Yool, A., Wiltshire, A., O'Connor, F. M., Stringer, M.,  
171 Hill, R., Palmieri, J., Woodward, S., de Mora, L., Kuhlbrodt, T., Rumbold, S. T., Kelley, D. I., Ellis, R.,  
172 Johnson, C. E., Walton, J., Abraham, N. L., Andrews, M. B., Andrews, T., Archibald, A. T., Berthou, S.,  
173 Burke, E., Blockley, E., Carslaw, K., Dalvi, M., Edwards, J., Folberth, G. A., Gedney, N., Griffiths, P. T.,  
174 Harper, A. B., Hendry, M. A., Hewitt, A. J., Johnson, B., Jones, A., Jones, C. D., Keeble, J., Liddicoat,  
175 S., Morgenstern, O., Parker, R. J., Predoi, V., Robertson, E., Siahann, A., Smith, R. S., Swaminathan, R.,  
176 Woodhouse, M. T., Zeng, G., and Zerroukat, M.: UKESM1: Description and Evaluation of the U.K. Earth  
177 System Model, *J. Adv. Model. Earth Syst.*, 11, 4513-4558, <https://doi.org/10.1029/2019MS001739>, 2019.

178 Sen, P. K.: Estimates of the Regression Coefficient Based on Kendall's Tau, *J. Am. Stat. Assoc.*, 63, 1379-  
179 1389, <https://doi.org/10.1080/01621459.1968.10480934>, 1968.

180 Tang, Y., Rumbold, S., Ellis, R., Kelley, D., Mulcahy, J., Sellar, A., Walton, J., and Jones, C.: MOHC  
181 UKESM1.0-LL model output prepared for CMIP6 CMIP (v20191011), Earth System Grid Federation  
182 [dataset], <https://doi.org/10.22033/ESGF/CMIP6.1569>, 2019.

183 Tegen, I., Neubauer, D., Ferrachat, S., Siegenthaler-Le Drian, C., Bey, I., Schutgens, N., Stier, P., Watson-  
184 Parris, D., Stanelle, T., Schmidt, H., Rast, S., Kokkola, H., Schultz, M., Schroeder, S., Daskalakis, N.,  
185 Barthel, S., Heinold, B., and Lohmann, U.: The global aerosol-climate model ECHAM6.3-HAM2.3 –  
186 Part 1: Aerosol evaluation, *Geosci. Model Dev.*, 12, 1643-1677, [https://doi.org/10.5194/gmd-12-1643-](https://doi.org/10.5194/gmd-12-1643-2019)  
187 [2019](https://doi.org/10.5194/gmd-12-1643-2019), 2019.

188 Theil, H.: A Rank-Invariant Method of Linear and Polynomial Regression Analysis, *Proc. R. Neth. Acad.*  
189 *Sci.*, 386-392, 1950.

190 Tilmes, S., Hodzic, A., Emmons, L. K., Mills, M. J., Gettelman, A., Kinnison, D. E., Park, M., Lamarque,  
191 J.-F., Vitt, F., Shrivastava, M., Campuzano-Jost, P., Jimenez, J. L., and Liu, X.: Climate Forcing and  
192 Trends of Organic Aerosols in the Community Earth System Model (CESM2), *J. Adv. Model. Earth Syst.*,  
193 11, 4323-4351, <https://doi.org/10.1029/2019MS001827>, 2019.

194 van Noije, T., Bergman, T., Le Sager, P., O'Donnell, D., Makkonen, R., Gonçalves-Ageitos, M., Döschner,  
195 R., Fladrich, U., von Hardenberg, J., Keskinen, J. P., Korhonen, H., Laakso, A., Myriokefalitakis, S.,  
196 Ollinaho, P., Pérez García-Pando, C., Reerink, T., Schrödner, R., Wyser, K., and Yang, S.: EC-Earth3-  
197 AerChem: a global climate model with interactive aerosols and atmospheric chemistry participating in  
198 CMIP6, *Geosci. Model Dev.*, 14, 5637-5668, <https://doi.org/10.5194/gmd-14-5637-2021>, 2021.

199 Wu, T., Zhang, F., Zhang, J., Jie, W., Zhang, Y., Wu, F., Li, L., Yan, J., Liu, X., Lu, X., Tan, H., Zhang,  
200 L., Wang, J., and Hu, A.: Beijing Climate Center Earth System Model version 1 (BCC-ESM1): model  
201 description and evaluation of aerosol simulations, *Geosci. Model Dev.*, 13, 977-1005,  
202 <https://doi.org/10.5194/gmd-13-977-2020>, 2020.

203 Wu, T., Lu, Y., Fang, Y., Xin, X., Li, L., Li, W., Jie, W., Zhang, J., Liu, Y., Zhang, L., Zhang, F., Zhang,  
204 Y., Wu, F., Li, J., Chu, M., Wang, Z., Shi, X., Liu, X., Wei, M., Huang, A., Zhang, Y., and Liu, X.: The  
205 Beijing Climate Center Climate System Model (BCC-CSM): the main progress from CMIP5 to CMIP6,  
206 *Geosci. Model Dev.*, 12, 1573-1600, <https://doi.org/10.5194/gmd-12-1573-2019>, 2019.

207 Yukimoto, S., Koshiro, T., Kawai, H., Oshima, N., Yoshida, K., Urakawa, S., Tsujino, H., Deushi, M.,  
208 Tanaka, T., Hosaka, M., Yoshimura, H., Shindo, E., Mizuta, R., Ishii, M., Obata, A., and Adachi, Y.: MRI  
209 MRI-ESM2.0 model output prepared for CMIP6 CMIP historical (v20200218), Earth System Grid  
210 Federation [dataset], <https://doi.org/10.22033/ESGF/CMIP6.6842>, 2019a.

211 Yukimoto, S., Kawai, H., Koshiro, T., Oshima, N., Yoshida, K., Urakawa, S., Tsujino, H., Deushi, M.,  
212 Tanaka, T., Hosaka, M., Yabu, S., Yoshimura, H., Shindo, E., Mizuta, R., Obata, A., Adachi, Y., and Ishii,  
213 M.: The Meteorological Research Institute Earth System Model Version 2.0, MRI-ESM2.0: Description  
214 and Basic Evaluation of the Physical Component, *J. Meteorol. Soc. Jpn.*, 97, 931-965,  
215 <https://doi.org/10.2151/jmsj.2019-051>, 2019b.

216 Zhang, J., Wu, T., Shi, X., Zhang, F., Li, J., Chu, M., Liu, Q., Yan, J., Ma, Q., and Wei, M.: BCC BCC-  
217 ESM1 model output prepared for CMIP6 CMIP (v20191127), Earth System Grid Federation [dataset],  
218 <https://doi.org/10.22033/ESGF/CMIP6.1734>, 2018.
